# Supplementary material for: Cost-effectiveness of the recombinant zoster vaccine (RZV) against herpes zoster: An updated critical review
Source: PubMed Central journal article supplement — Hum Vaccin Immunother. 2023 Mar 14;19(1):2168952. doi: 10.1080/21645515.2023.2168952 (PMC10054181; doi:10.1080/21645515.2023.2168952), 2023-03-14
Supplement: KHVI_A_2168952_SM1456.pdf [file KHVI_A_2168952_SM1456.pdf]

1

## Supplementary Material

2

### 3 Appendix A

|                         |                                                                                                                                                                                                                                                                                                                                                                                                                                  |
|-------------------------|----------------------------------------------------------------------------------------------------------------------------------------------------------------------------------------------------------------------------------------------------------------------------------------------------------------------------------------------------------------------------------------------------------------------------------|
| <b>PUBMED<br/>QUERY</b> | ( (2017/01/01:2022/02/28 [dp]) AND ( (zoster [title]) OR (herpes zoster [title]) OR (herpes-zoster [title]) OR (varicella zoster [title]) OR (varicella-zoster [title]) OR (shingles [title])) AND ((cost [title]) OR (economic [title]) OR (value [title]) OR (cost effective [title]) OR (cost-effective [title]) OR (cost-benefit [title]) OR (cost/effective [title]) OR (cost-utility [title]) OR (cost/utility [title])) ) |
|-------------------------|----------------------------------------------------------------------------------------------------------------------------------------------------------------------------------------------------------------------------------------------------------------------------------------------------------------------------------------------------------------------------------------------------------------------------------|

4

|                         |                                                                                                                                                                                                                                                                                          |
|-------------------------|------------------------------------------------------------------------------------------------------------------------------------------------------------------------------------------------------------------------------------------------------------------------------------------|
| <b>EMBASE<br/>QUERY</b> | (zoster:ti OR herpes?zoster:ti OR varicella?zoster:ti OR shingles:ti)<br>AND (cost?:ti OR economic:ti OR value:ti OR cost?effective*:ti OR cost?benefit:ti OR cost?utility:ti)<br><br>Interactive filters: Publication Year (2017-2022), Date Added to Embase (01-01-2017 to 28-02-2022) |
|-------------------------|------------------------------------------------------------------------------------------------------------------------------------------------------------------------------------------------------------------------------------------------------------------------------------------|

5

|                           |                                                            |
|---------------------------|------------------------------------------------------------|
| <b>COCHRANE<br/>QUERY</b> | Interactive query on title and abstract of reviews: zoster |
|---------------------------|------------------------------------------------------------|

6

7

## 8 Appendix B (Detailed Model Input Tables)

### 9 Table B1: Epidemiological model parameters

| Author/year                                | Epi sources                                     | HZ incidence (per 1000 PY) by age group                                                                           | PHN relative incidence (%) by age group                                                      | Complications (per HZ case unless otherwise specified)                                                                                                                                                                                                                                            | Hospitalizations (per HZ case unless otherwise specified)                                                          | HZ mortality (per 100,000 HZ cases unless otherwise specified)                                  |
|--------------------------------------------|-------------------------------------------------|-------------------------------------------------------------------------------------------------------------------|----------------------------------------------------------------------------------------------|---------------------------------------------------------------------------------------------------------------------------------------------------------------------------------------------------------------------------------------------------------------------------------------------------|--------------------------------------------------------------------------------------------------------------------|-------------------------------------------------------------------------------------------------|
| <b>Le and Rothberg (2018)<sup>1</sup></b>  | Multiple, local                                 | M: 8.9 (60-69), 11.3 (70-79), 12.2 (≥80);<br>F: 12.5 (60-69), 15.1 (70-79), 16.5 (≥80)                            | 6.90% (60-69), 18.5% (≥70)                                                                   | Ophthalmic: 2.2%, 3.9% thereof leading to monocular blindness;<br>Aural: 0.2%, 6.9% thereof leading to monaural deafness                                                                                                                                                                          | 1.3% (60-69), 1.8% (70-79), 5.5% (≥80)                                                                             | 2.22 (60-69), 6.18 (70-79), 23.96 (80-89), 152.13 (≥90)                                         |
| <b>You et al (2018)<sup>2</sup></b>        | Multiple, international, excluding case reports | M: 7.2 (50-59), 10.7 (60-69), 12.5 (70-79), 10.0 (≥80);<br>F: 9.3 (50-59), 11.3 (60-69), 12.0 (70-79), 10.5 (≥80) | M: 7.07% (50-59), 15.42 (60-79), 31.53 (≥80);<br>F: 6.94% (50-59), 13.53 (60-79), 21.9 (≥80) | Per hospitalized case:<br>Ophthalmic 6.7%;<br>Secondary skin and soft tissue infection 3.8%;<br>Ramsay Hunt syndrome 1.9%;<br>Disseminated HZ 1%,<br>Central nervous system infection 1%                                                                                                          | 2.67% (50-59), 4.14% (60-69), 7.17% (70-79), 10.29% (80≥)                                                          | Relative to hospitalized HZ cases: 0.056% (50-59), 0.111% (60-69), 0.293% (70-79), 1.151% (≥80) |
| <b>Curran et al (2018)<sup>3</sup></b>     | Local                                           | 6.74 (50-59), 9.32 (60-69), 12.02 (70-79), 12.78 (≥80)                                                            | 6.20% (50-69), 12.70% (≥70);                                                                 | Ocular: 2.87% (50-59), 4.23% (60-69), 4.53% (70-79); 6.91% (≥80);<br>Neurological: 2.23% (50-59), 3.17% (60-69), 5.92% (70-79); 4.88% (≥80);<br>Cutaneous: 1.59% (50-59), 1.06% (60-69), 2.09% (70-79); 2.85% (≥80);<br>Other non-pain: 1.59% (50-59), 1.41% (60-69), 2.09% (70-79); 2.85% (≥80); |                                                                                                                    | 1.3 (50-59), 2.2 (60-69), 6.2 (70-79), 24.0 (80-84), 73.4 (≥85)                                 |
| <b>Le and Rothberg (2018b)<sup>4</sup></b> | Single, local                                   | M: 8.9 (60-69), 11.3 (70-79), 12.2 (≥80);<br>F: 12.5 (60-69), 15.1 (70-79), 16.5 (≥80)                            | 6.90% (60-69), 18.5% (≥70)                                                                   | Ophthalmic: 2.2%, 3.9% thereof leading to monocular blindness;<br>Aural: 0.2%, 6.9% thereof leading to monaural deafness                                                                                                                                                                          |                                                                                                                    |                                                                                                 |
| <b>de Boer et al (2018)<sup>5</sup></b>    | Local                                           | 5.91 (50-59), 8.57 (60-69), 11.9 (70-79), 14.81 (≥80)                                                             | 2.2% (50-59), 7.3% (≥60)                                                                     |                                                                                                                                                                                                                                                                                                   | Overall: 2.5/591 (50-59), 4.9/857 (60-69), 9.5/1190 (70-79), 18.4/1481 (≥80);<br>One-day: 3.6/591 (50-59), 9.6/857 | 0.01 (50-59), 0.04 (60-69), 0.18 (70-79), 1.65 (80-89), 10.89 (≥90)                             |

| Author/year                                  | Epi sources                                     | HZ incidence (per 1000 PY) by age group                                                                           | PHN relative incidence (%) by age group                                                      | Complications (per HZ case unless otherwise specified)                                                                                                                                                                                                                                            | Hospitalizations (per HZ case unless otherwise specified) | HZ mortality (per 100,000 HZ cases unless otherwise specified)                           |
|----------------------------------------------|-------------------------------------------------|-------------------------------------------------------------------------------------------------------------------|----------------------------------------------------------------------------------------------|---------------------------------------------------------------------------------------------------------------------------------------------------------------------------------------------------------------------------------------------------------------------------------------------------|-----------------------------------------------------------|------------------------------------------------------------------------------------------|
|                                              |                                                 |                                                                                                                   |                                                                                              |                                                                                                                                                                                                                                                                                                   | (60-69), 21.8/1190 (70-79), 28.2/1481 (≥80)               |                                                                                          |
| <b>Van Oorschot et al (2019)<sup>6</sup></b> | Local                                           | 10.0 (60-64), 11.4 (65-69), 13.4 (70-79), 13.9 (≥80);                                                             | 15.4% (60-64), 17.5% (65-69), 20% (70-79), 20.4% (≥80);                                      | Ocular: 2.87% (50-59), 4.23% (60-69), 4.53% (70-79); 6.91% (≥80);<br>Neurological: 2.23% (50-59), 3.17% (60-69), 5.92% (70-79); 4.88% (≥80);<br>Cutaneous: 1.59% (50-59), 1.06% (60-69), 2.09% (70-79); 2.85% (≥80);<br>Other non-pain: 1.59% (50-59), 1.41% (60-69), 2.09% (70-79); 2.85% (≥80); |                                                           | 3 (60-64), 5 (65-69), 10 (70-74), 25 (75-79), 43 (80-84), 165 (≥85);                     |
| <b>Curran et al (2019)<sup>7</sup></b>       | Local                                           | 6.74 (50-59), 9.32 (60-69), 12.02 (70-79), 12.78 (≥80)                                                            | 6.20% (50-69), 12.70% (≥70);                                                                 | Ocular: 2.87% (50-59), 4.23% (60-69), 4.53% (70-79); 6.91% (≥80);<br>Neurological: 2.23% (50-59), 3.17% (60-69), 5.92% (70-79); 4.88% (≥80);<br>Cutaneous: 1.59% (50-59), 1.06% (60-69), 2.09% (70-79); 2.85% (≥80);<br>Other non-pain: 1.59% (50-59), 1.41% (60-69), 2.09% (70-79); 2.85% (≥80); |                                                           |                                                                                          |
| <b>You et al (2019)<sup>8</sup></b>          | Multiple, international, excluding case reports | M: 7.2 (50-59), 10.7 (60-69), 12.5 (70-79), 10.0 (≥80);<br>F: 9.3 (50-59), 11.3 (60-69), 12.0 (70-79), 10.5 (≥80) | M: 7.07% (50-59), 15.42 (60-79), 31.53 (≥80);<br>F: 6.94% (50-59), 13.53 (60-79), 21.9 (≥80) | Per hospitalized case (all ages):<br>Ophthalmic 6.7%;<br>Skin & soft tissue infection 3.8%;<br>Oticus 1.9%;<br>Disseminated HZ 1%,<br>Central nervous system infection 1%                                                                                                                         | 2.67% (50-59), 4.14% (60-69), 7.17% (70-79), 10.29% (≥80) | Per hospitalized case:<br>0.056% (50-59), 0.111% (60-69), 0.293% (70-79), 1.151% (≥80)   |
| <b>Prosser et al (2019)<sup>9</sup></b>      | Multiple, local                                 | 5.0 (50-59), 8.0 (60-69), 10.0 (70-79), 13.0 (80-89), 15.0 (≥80)                                                  | 8.3% (50-59), 11.5% (60-69), 15.4% (70-79), 19.7% (80-89), 24.1% (≥80)                       | Ocular: 9% (all ages);<br>Neurological: 0% to 5% (all ages);<br>Cosmetic: 0% to 5% (all ages)                                                                                                                                                                                                     |                                                           | 1.0 (50-69), 2.7 (70-99)                                                                 |
| <b>Shiragami et al (2019)<sup>10</sup></b>   | Single, local                                   | 9.2 (50-59), 9.6 (60-69), 12.9 (70-79), 12.6 (≥80)                                                                | 14.6% (50-59), 14.6% (60-69), 20.2% (70-79), 32.9% (≥80)                                     | Non-PHN: 5.1% (50-69), 10.6% (≥70)                                                                                                                                                                                                                                                                |                                                           | 2 (70-74), 9.2 (75-79), 21 (80-84), 46.7 (85-89), 120.4 (90-94), 196 (95-99), 947 (≥100) |

| Author/year                                | Epi sources          | HZ incidence (per 1000 PY) by age group                                                                                                                                                                                                                                              | PHN relative incidence (%) by age group                                                             | Complications (per HZ case unless otherwise specified)                                                                                                                                                                                                                                            | Hospitalizations (per HZ case unless otherwise specified) | HZ mortality (per 100,000 HZ cases unless otherwise specified)                  |
|--------------------------------------------|----------------------|--------------------------------------------------------------------------------------------------------------------------------------------------------------------------------------------------------------------------------------------------------------------------------------|-----------------------------------------------------------------------------------------------------|---------------------------------------------------------------------------------------------------------------------------------------------------------------------------------------------------------------------------------------------------------------------------------------------------|-----------------------------------------------------------|---------------------------------------------------------------------------------|
| <b>Hoshi et al (2019)<sup>11</sup></b>     | Two, local           | M: 6.25 (60-69), 8.44 (70-79), 8.45 (80-89), 6.78 (≥90);<br>F: 8.08 (60-69), 8.89 (70-79), 8.30 (80-89), 6.51 (≥90)                                                                                                                                                                  | M: 19.4% (60-69), 12.5% (70-79), 34.8% (≥80);<br>F: 10.8% (60-69), 24.7% (70-79), 32% (≥80)         | No complications                                                                                                                                                                                                                                                                                  |                                                           |                                                                                 |
| <b>Carpenter et al (2019)<sup>12</sup></b> | Local                | 6.74 (50-59), 9.32 (60-69), 12.02 (70-79), 12.78 (80-100)                                                                                                                                                                                                                            | 3.8% (50-59), 6.9% (60-69), 18.5% (70-100)                                                          | Acute ocular: 3% (50-59), 4% (60-69), 5% (70-79), 7% (80-100)                                                                                                                                                                                                                                     |                                                           | 1.26 (50-59), 2.22 (60-69), 6.18 (70-79), 23.96 (80-89), 152.13 (90-100)        |
| <b>Drolet et al (2019)<sup>13</sup></b>    | Multiple, local      | 3.8 (50-54), 6 (55-64), 8.6 (65-74), 9.9 (≥75)                                                                                                                                                                                                                                       | 9.4% (50-54), 9.4% (55-64), 26% (65-74), 27.7% (≥75)                                                |                                                                                                                                                                                                                                                                                                   | 1.1% (50-54), 1.6% (55-64), 3.3% (65-74), 9.9% (≥75)      | 0 (50-54), 0 (55-64), 12 (65-74), 76 (≥75)                                      |
| <b>McGirr et al (2019)<sup>14</sup></b>    | Local (regional)     | 5.982 (50-59), 8.662 (60-69), 10.841 (70-79), 11.039 (≥80)                                                                                                                                                                                                                           | 14.6% (50-59), 20.5% (60-69), 33.8% (≥70)                                                           | Ocular: 2.87% (50-59), 3.82% (60-69), 4.14% (70-79); 5.41% (≥80);<br>Neurological: 2.46% (50-59), 3.17% (60-69), 5.99% (70-79); 4.23% (≥80);<br>Cutaneous: 1.74% (50-59), 1.05% (60-69), 2.09% (70-79); 2.44% (≥80);<br>Other non-pain: 2.03% (50-59), 1.63% (60-69), 2.44% (70-79); 2.85% (≥80); |                                                           | 0 (50-64), 12 (65-79), 76 (≥80)                                                 |
| <b>Curran et al (2021)<sup>15</sup></b>    | Local                | 7.72 (50-59), 10.0 (60-64), 11.4 (65-69), 13.3 (70-79), 13.8 (≥80);                                                                                                                                                                                                                  | 13% (50-59), 15.4% (60-64), 17.5% (65-69), 20% (70-79), 20.4% (≥80);                                |                                                                                                                                                                                                                                                                                                   |                                                           | 1 (50-59), 3 (60-64), 5 (65-69), 10 (70-74), 25 (75-79), 43 (80-84), 165 (≥85); |
| <b>Pieters et al (2022)<sup>16</sup></b>   | Local (HZ), UK (PHN) | GP rate: 4.0 (50), 5.6 (60), 7.8 (70), 9.9 (80), 10 (85);<br>Hospitalization rate: 9.4e-2 (50), 1.9e-1 (60), 3.3e-1 (70), 6.8e-1 (80), 8.9e-1 (85);<br>IC-free adjustments:<br>GP rate: 0.465 (50-59), 0.7139 (60-69), 0.6652 (70-79), 0.6203 (≥80);<br>Hospitalization rate: 0.3708 | 8% (50-54), 10% (55-59), 11% (60-64), 13% (65-69), 15% (70-74), 18% (75-79), 21% (80-84), 19% (≥85) |                                                                                                                                                                                                                                                                                                   | Absolute rates reported (see column HZ incidence)         | 0 (50-59), 0.018 (60-74), 0.54 (75-89); 4.0 (≥90)                               |

| Author/year                               | Epi sources | HZ incidence (per 1000 PY) by age group                                                                                                                                                                                                                                  | PHN relative incidence (%) by age group                      | Complications (per HZ case unless otherwise specified) | Hospitalizations (per HZ case unless otherwise specified) | HZ mortality (per 100,000 HZ cases unless otherwise specified) |
|-------------------------------------------|-------------|--------------------------------------------------------------------------------------------------------------------------------------------------------------------------------------------------------------------------------------------------------------------------|--------------------------------------------------------------|--------------------------------------------------------|-----------------------------------------------------------|----------------------------------------------------------------|
|                                           |             | (50-59), 0.5915 (60-69), 0.4000 (70-79), 0.4356 (≥80)                                                                                                                                                                                                                    |                                                              |                                                        |                                                           |                                                                |
| <b>Ortega-Sanchez (2021)<sup>27</sup></b> | Local, US   | CDC Model: 40.2<br>GSK Model: 60.0                                                                                                                                                                                                                                       | CDC Model: 9.1%<br>GSK Model: 12.9%                          |                                                        |                                                           |                                                                |
| <b>Ultsch et al (2017)<sup>28</sup></b>   | Local       | M: 4.64 (50-54), 5.84 (55-59), 7.22 (60-64), 8.95 (65-69), 9.87 (70-74), 10.96 (75-79), 11.35 (80-84), 11.65 (85-89), 11.98 (≥90);<br>F: 7.8 (50-54), 9.31 (55-59), 10.59 (60-64), 12.3 (65-69), 12.58 (70-74), 13.02 (75-79), 13.14 (80-84), 12.91 (85-89), 13.57 (≥90) | 17.27% (50-59), 20.51% (60-69), 24.05% (70-79), 26.03% (≥80) |                                                        |                                                           |                                                                |

10

11 CDC: Centers for Disease Control and Prevention; Epi: Epidemiological; GP: general practitioner; HZ: herpes zoster; IC: immunocompromised; M/F:  
12 male/female; PHN: post-herpetic neuralgia; PY: person-year; UK: United Kingdom; US: United States

13

14 **Table B2: RZV vaccine characteristics**

| Author/year                                  | Efficacy modeling RZV | HZ model 2-dose RZV                                                                                                             | HZ model 1-dose RZV                                                                                                                                                         | Series completion | Completion reference |
|----------------------------------------------|-----------------------|---------------------------------------------------------------------------------------------------------------------------------|-----------------------------------------------------------------------------------------------------------------------------------------------------------------------------|-------------------|----------------------|
| <b>Le and Rothberg (2018)<sup>1</sup></b>    | Linear                | Intercept 1.049, Slope -0.054 (60-69);<br>Intercept 1.008, Slope -0.054 ( $\geq 70$ )                                           | Intercept 0.927, Slope - 0.109 (60-69);<br>Intercept 0.722, Slope - 0.109 ( $\geq 70$ )                                                                                     | 56.20%            | Hep A                |
| <b>You et al (2018)<sup>2</sup></b>          | Linear                | Intercept 1.0765, Slope -0.0319 (all ages)                                                                                      | Intercept 0.8801, Slope -0.0507 (all ages)                                                                                                                                  | 100%              | Assumed              |
| <b>Curran et al (2018)<sup>3</sup></b>       | Linear                | Intercept 0.984, Slope (Years 1-4) -0.01, Slope ( $\geq$ Year 5) -0.023 (50-69);<br>Intercept 0.978, Slope -0.036 ( $\geq 70$ ) | Intercept 0.901, Slope (Years 1-4) -0.054, Slope ( $\geq$ Year 5) -0.051 (50-69);<br>Intercept 0.695, Slope (Years 1-4) -0.054, Slope ( $\geq$ Year 5) -0.051 ( $\geq 70$ ) | 69%               | NA                   |
| <b>Le and Rothberg (2018b)<sup>4</sup></b>   | NA                    | NA                                                                                                                              | NA                                                                                                                                                                          | 69%               | Hep A, B             |
| <b>de Boer et al (2018)<sup>5</sup></b>      | Linear                | Intercept 0.981, Slope -0.009 (50-69);<br>Intercept 0.992, Slope -0.041 ( $\geq 70$ )                                           | Assumed equal to 1-dose ZVL                                                                                                                                                 | 100%              | NA                   |
| <b>Van Oorschot et al (2019)<sup>6</sup></b> | NA                    | Intercept 0.984, Slope (Years 1-4) -0.01, Slope ( $\geq$ Year 5) -0.023 (50-69);<br>Intercept 0.978, Slope -0.036 ( $\geq 70$ ) | Intercept 0.901, Slope (Years 1-4) -0.054, Slope ( $\geq$ Year 5) -0.051 (50-69);<br>Intercept 0.695, Slope (Years 1-4) -0.054, Slope ( $\geq$ Year 5) -0.051 ( $\geq 70$ ) | 70%               | Assumed              |
| <b>Curran et al (2019)<sup>7</sup></b>       | NA                    | Intercept 0.984, Slope (Years 1-4) -0.01, Slope ( $\geq$ Year 5) -0.023 (50-69);<br>Intercept 0.978, Slope -0.036 ( $\geq 70$ ) | Intercept 0.901, Slope (Years 1-4) -0.054, Slope ( $\geq$ Year 5) -0.051 (50-69);<br>Intercept 0.695, Slope (Years 1-4) -0.054, Slope ( $\geq$ Year 5) -0.051 ( $\geq 70$ ) | NA                | NA                   |
| <b>You et al (2019)<sup>8</sup></b>          | Linear                | Intercept 1.0765, Slope -0.0319 (all ages)                                                                                      | Intercept 0.8801, Slope -0.0507 (all ages)                                                                                                                                  | 100%              | Assumed              |
| <b>Prosser et al (2019)<sup>9</sup></b>      | Linear                | Intercept 1.0; Waning to 0 after 19.4 years (50-59);<br>Intercept 0.97; Waning to 0 after 18.8 years ( $\geq 60$ )              | Intercept 0.90; Waning to 0 after 11 years (50-59);<br>Intercept 0.69; Waning to 0 after 4 years ( $\geq 60$ )                                                              | 100%              | Assumed              |

| Author/year                          | Efficacy modeling RZV | HZ model 2-dose RZV                                                                                                                                                      | HZ model 1-dose RZV                                                                                                                                                  | Series completion                   | Completion reference |
|--------------------------------------|-----------------------|--------------------------------------------------------------------------------------------------------------------------------------------------------------------------|----------------------------------------------------------------------------------------------------------------------------------------------------------------------|-------------------------------------|----------------------|
| Shiragami et al (2019) <sup>10</sup> | Linear                | Intercept 0.984, Slope -0.01 (Years 1-4), -0.023 (Years ≥ 5) (50-69);<br>Intercept 0.978, Slope -0.036 (≥70)                                                             | 50-69: Intercept 0.900, Slope -0.054 (Years 1-4), -0.051 (Years ≥ 5)<br>70+: Intercept 0.695, Slope -0.054 (Years 1-4), -0.051 (Years ≥ 5)                           | 95%                                 | RCT                  |
| Hoshi et al (2019) <sup>11</sup>     | Linear                | Intercept 1.00; Waning to 0 after 19.4 years (65-69);<br>Intercept 0.97; Waning to 0 after 18.8 years (≥70)                                                              | Intercept 0.90; Waning to 0 after 11 years (65-69);<br>Intercept 0.69; Waning to 0 after 4 years (≥70)                                                               | 80%                                 | Informed literature  |
| Carpenter et al (2019) <sup>12</sup> | Linear                | Intercept 0.969, Slope -0.0544 (50-59);<br>Intercept 0.941, Slope -0.0544 (60-69);<br>Intercept 0.899, Slope -0.0544 (70-79);<br>Intercept 0.897, Slope -0.0544 (80-100) | Intercept 0.969, Slope -0.080 (50-59);<br>Intercept 0.941, Slope -0.080 (60-69);<br>Intercept 0.899, Slope -0.080 (70-79);<br>Intercept 0.897, Slope -0.080 (80-100) | Unclear                             | NA                   |
| Drolet et al (2019) <sup>13</sup>    | 6 functions           |                                                                                                                                                                          |                                                                                                                                                                      | Varied in PSA                       |                      |
| McGirr et al (2019) <sup>14</sup>    | Linear                | Intercept 0.9840, Slope -0.01 (Years 1-4), -0.023 (Years ≥ 5) (50-69);<br>Intercept 0.9784 Slope -0.036 (≥70)                                                            | Intercept 0.900, Slope -0.054 (Years 1-4), -0.051 (Years ≥ 5) (50-69);<br>Intercept 0.695, Slope -0.054 (Years 1-4), -0.051 (Years ≥ 5) (≥70)                        | 75%                                 | NA                   |
| Curran et al (2021) <sup>15</sup>    | Linear                | Intercept 0.989, Slope -0.015 (50-59);<br>Intercept 0.954, Slope -0.023 (≥60)                                                                                            | Intercept 0.900, Slope -0.054 (Years 1-4), -0.051 (Years ≥ 5) (50-69);<br>Intercept 0.695, Slope -0.054 (Years 1-4), -0.051 (Years ≥ 5) (≥70)                        | 70%                                 | Assumed              |
| Pieters et al (2022) <sup>16</sup>   | 6 functions           | 1-minus exponential model:<br>VE = 1 - exp(A+B*Years) with A=log(0.0162), B=0.3068;<br>Logarithmic model:<br>VE = A - B*log(Years) with A=0.9768, B=0.0179               | NA                                                                                                                                                                   | 100%                                | NA                   |
| Ortega-Sanchez (2021) <sup>17</sup>  | Linear                | CDC Model: 0.680 waning to 0 in 20 years<br>GSK Model: 0.725, waning 0.091                                                                                               | CDC Model: 0.390 waning to 0 in 11 years<br>GSK Model: 0.580, waning 0.182                                                                                           | CDC Model: < 86%<br>GSK Model: 100% | Assumed              |
| Ultsch et al (2017) <sup>18</sup>    | Linear                | HZ: 0.97 (Year 1), 0.91 (Year 2), 0.82 (Year 3), 0.85 (Year 4);<br>PHN: 0.98 (Year 1), 0.92 (Year 2), 0.85 (Year 3), 0.88 (Year 4)                                       | NA                                                                                                                                                                   | 100%                                | Assumed              |



16 CDC: Centers for Disease Control and Prevention; RCT: randomized clinical trial; Hep A/B: hepatitis A/B; HZ: herpes zoster; NA: Not applicable;  
17 PHN: post-herpetic neuralgia; PSA: probabilistic sensitivity analysis; RCT: randomized control trial; RZV: recombinant zoster vaccine; VE: vaccine  
18 effectiveness.

19

20 **Table B3: ZVL vaccine characteristics**

| Author/Year                                  | Efficacy source ZVL   | Top-up efficacy ZVL | Efficacy modeling ZVL | HZ model ZVL                                                                                                                                                                                                                                                                                                                     | PHN model ZVL                                                                                                                                                                                                                                                                                                                    |
|----------------------------------------------|-----------------------|---------------------|-----------------------|----------------------------------------------------------------------------------------------------------------------------------------------------------------------------------------------------------------------------------------------------------------------------------------------------------------------------------|----------------------------------------------------------------------------------------------------------------------------------------------------------------------------------------------------------------------------------------------------------------------------------------------------------------------------------|
| <b>Le and Rothberg (2018)<sup>1</sup></b>    | SPS, STPS, LTPS       | PHN, BOI            | Linear                | Intercept 0.6478, Slope -0.0544;<br>Adjusted with likelihood ratios by age:<br>1.797 (60-64), 1.582 (65-69), 0.742 (70-74), 0.541 (75-79),<br>0.232 (80-84), 0.080 (≥85)                                                                                                                                                         | Intercept 0.632, Slope (Years 1-5) 0, Slope (Year ≥ 6) -0.1;                                                                                                                                                                                                                                                                     |
| <b>You et al (2018)<sup>2</sup></b>          | NA                    | NA                  | NA                    | NA                                                                                                                                                                                                                                                                                                                               | NA                                                                                                                                                                                                                                                                                                                               |
| <b>Curran et al (2018)<sup>3</sup></b>       | SPS, ZEST, STPS, LTPS | PHN                 | Linear                | Intercept 0.698, Slope (Years 1-4) -0.0544, Slope (≥ Year 5) -0.0510 (50-59);<br>Intercept 0.6389, Slope (Years 1-4) -0.0544, Slope (≥ Year 5) -0.0510 (60-69);<br>Intercept 0.4085, Slope (Years 1-4) -0.0544, Slope (≥ Year 5) -0.0510 (70-79);<br>Intercept 0.1825, Slope (Years 1-4) -0.0544, Slope (≥ Year 5) -0.0510 (≥80) | Intercept 0.698, Slope (Years 1-4) -0.0544, Slope (≥ Year 5) -0.0510 (50-59);<br>Intercept 0.6569, Slope (Years 1-4) -0.0544, Slope (≥ Year 5) -0.0510 (60-69);<br>Intercept 0.7338, Slope (Years 1-4) -0.0544, Slope (≥ Year 5) -0.0510 (70-79);<br>Intercept 0.3951, Slope (Years 1-4) -0.0544, Slope (≥ Year 5) -0.0510 (≥80) |
| <b>Le and Rothberg (2018b)<sup>4</sup></b>   | SPS, ZEST, STPS, LTPS | PHN                 | Linear                | 50-59: Intercept 0.698, Slope - 0.054 (Years 1-4), -0.051 (Year ≥ 5)<br>60-69: Intercept 0.639, Slope - 0.054 (Years 1-4), -0.051 (Year ≥ 5)<br>70-79: Intercept 0.409, Slope - 0.054 (Years 1-4), -0.051 (Year ≥ 5)                                                                                                             |                                                                                                                                                                                                                                                                                                                                  |
| <b>de Boer et al (2018)<sup>5</sup></b>      | SPS, STPS, LTPS       | No                  | 1-minus exponential;  | [1 – exp(Intercept + Slope*Year)]<br>Intercept -0.893, Slope 0.0807;<br>Adjusted with likelihood ratios by age:<br>1.282 (50-59), 1.274 (60-69), 1.219 (65-69), 0.852 (70-74),<br>0.711 (75-79), 0.391 (80-84), 0.152 (≥85)                                                                                                      | No                                                                                                                                                                                                                                                                                                                               |
| <b>Van Oorschot et al (2019)<sup>6</sup></b> | NA                    | NA                  | NA                    | NA                                                                                                                                                                                                                                                                                                                               | NA                                                                                                                                                                                                                                                                                                                               |

| Author/Year                          | Efficacy source ZVL                  | Top-up efficacy ZVL | Efficacy modeling ZVL | HZ model ZVL                                                                                                                                                                                                                                                                                                                                                    | PHN model ZVL                                                                                                                                                                                                                                                                                                                                                   |
|--------------------------------------|--------------------------------------|---------------------|-----------------------|-----------------------------------------------------------------------------------------------------------------------------------------------------------------------------------------------------------------------------------------------------------------------------------------------------------------------------------------------------------------|-----------------------------------------------------------------------------------------------------------------------------------------------------------------------------------------------------------------------------------------------------------------------------------------------------------------------------------------------------------------|
| Curran et al (2019) <sup>7</sup>     | SPS, ZEST, STPS, LTPS                | PHN                 | Linear                | Intercept 0.698, Slope (Years 1-4) -0.0544, Slope ( $\geq$ Year 5) -0.0510 (50-59);<br>Intercept 0.6389, Slope (Years 1-4) -0.0544, Slope ( $\geq$ Year 5) -0.0510 (60-69);<br>Intercept 0.4085, Slope (Years 1-4) -0.0544, Slope ( $\geq$ Year 5) -0.0510 (70-79);<br>Intercept 0.1825, Slope (Years 1-4) -0.0544, Slope ( $\geq$ Year 5) -0.0510 ( $\geq$ 80) | Intercept 0.698, Slope (Years 1-4) -0.0544, Slope ( $\geq$ Year 5) -0.0510 (50-59);<br>Intercept 0.6569, Slope (Years 1-4) -0.0544, Slope ( $\geq$ Year 5) -0.0510 (60-69);<br>Intercept 0.7338, Slope (Years 1-4) -0.0544, Slope ( $\geq$ Year 5) -0.0510 (70-79);<br>Intercept 0.3951, Slope (Years 1-4) -0.0544, Slope ( $\geq$ Year 5) -0.0510 ( $\geq$ 80) |
| You et al (2019) <sup>8</sup>        | NA                                   | NA                  | NA                    | NA                                                                                                                                                                                                                                                                                                                                                              | NA                                                                                                                                                                                                                                                                                                                                                              |
| Prosser et al (2019) <sup>9</sup>    | SPS, LTPS                            | No                  | Linear                | Intercept 0.781; Waning to 0 after 12 years (50);<br>Intercept 0.779; Waning to 0 after 10 years (60);<br>Intercept 0.659; Waning to 0 after 7 years (70);<br>Intercept 0.385; Waning to 0 after 4 years (80);<br>Intercept 0.095; Waning to 0 after 1 years (90)                                                                                               | No                                                                                                                                                                                                                                                                                                                                                              |
| Shiragami et al (2019) <sup>10</sup> | SPS, ZEST, STPS, LTPS                | PHN                 | Linear                | Intercept 0.698, Slope (Years 1-4) -0.0544, Slope ( $\geq$ Year 5) -0.0510 (50-59);<br>Intercept 0.6389, Slope (Years 1-4) -0.0544, Slope ( $\geq$ Year 5) -0.0510 (60-69);<br>Intercept 0.4085, Slope (Years 1-4) -0.0544, Slope ( $\geq$ Year 5) -0.0510 (70-79);<br>Intercept 0.1825, Slope (Years 1-4) -0.0544, Slope ( $\geq$ Year 5) -0.0510 ( $\geq$ 80) | Intercept 0.698, Slope (Years 1-4) -0.0544, Slope ( $\geq$ Year 5) -0.0510 (50-59);<br>Intercept 0.6569, Slope (Years 1-4) -0.0544, Slope ( $\geq$ Year 5) -0.0510 (60-69);<br>Intercept 0.7338, Slope (Years 1-4) -0.0544, Slope ( $\geq$ Year 5) -0.0510 (70-79);<br>Intercept 0.3951, Slope (Years 1-4) -0.0544, Slope ( $\geq$ Year 5) -0.0510 ( $\geq$ 80) |
| Hoshi et al (2019) <sup>11</sup>     | RWE <sup>19</sup> (Baxter)           | No                  | Lookup                | 70.6% (Year 1) to 32.1% (Year 8) (65-69);<br>64.5% (Year 1) to 0% (Year 8) (70-79);<br>63.7% (Year 1) to 0% (Year 7) ( $\geq$ 80)                                                                                                                                                                                                                               | No                                                                                                                                                                                                                                                                                                                                                              |
| Carpenter et al (2019) <sup>12</sup> | Le and Rothberg (2015) based on LTPS | No                  | Linear                | Intercept 0.698, Slope -0.0544 (50-59);<br>Intercept 0.657, Slope -0.0544 (60-69);<br>Intercept 0.407, Slope -0.0544 (70-79);<br>Intercept 0.157, Slope -0.0544 (80-100)                                                                                                                                                                                        | No                                                                                                                                                                                                                                                                                                                                                              |

| Author/Year                         | Efficacy source ZVL | Top-up efficacy ZVL | Efficacy modeling ZVL                 | HZ model ZVL                                                                                                                                                                                                                                                                                                                     | PHN model ZVL                                                                                                                                                                                                                                                                                                                    |
|-------------------------------------|---------------------|---------------------|---------------------------------------|----------------------------------------------------------------------------------------------------------------------------------------------------------------------------------------------------------------------------------------------------------------------------------------------------------------------------------|----------------------------------------------------------------------------------------------------------------------------------------------------------------------------------------------------------------------------------------------------------------------------------------------------------------------------------|
| Drolet et al (2019) <sup>13</sup>   | All RCTs            | NA                  | 6 functions                           | I + S*Years (linear);<br>I + S*log(Years) (logarithmic);<br>I*exp(S*Years) (exponential);<br>1- I*exp(S*Years) (1-minus exponential);<br>I*Pow(Years, S) (power);<br>1 - I*Pow(Years, S) (1-minus power)<br>Constants not stated                                                                                                 | No                                                                                                                                                                                                                                                                                                                               |
| McGirr et al (2019) <sup>14</sup>   | RCT                 | PHN                 | Linear                                | Intercept 0.698, Slope (Years 1-4) -0.0544, Slope (≥ Year 5) -0.0510 (50-59);<br>Intercept 0.6389, Slope (Years 1-4) -0.0544, Slope (≥ Year 5) -0.0510 (60-69);<br>Intercept 0.4085, Slope (Years 1-4) -0.0544, Slope (≥ Year 5) -0.0510 (70-79);<br>Intercept 0.1825, Slope (Years 1-4) -0.0544, Slope (≥ Year 5) -0.0510 (≥80) | Intercept 0.698, Slope (Years 1-4) -0.0544, Slope (≥ Year 5) -0.0510 (50-59);<br>Intercept 0.6569, Slope (Years 1-4) -0.0544, Slope (≥ Year 5) -0.0510 (60-69);<br>Intercept 0.7338, Slope (Years 1-4) -0.0544, Slope (≥ Year 5) -0.0510 (70-79);<br>Intercept 0.3951, Slope (Years 1-4) -0.0544, Slope (≥ Year 5) -0.0510 (≥80) |
| Curran et al (2021) <sup>15</sup>   | NA                  | NA                  | NA                                    | NA                                                                                                                                                                                                                                                                                                                               | NA                                                                                                                                                                                                                                                                                                                               |
| Pieters et al (2022) <sup>16</sup>  | SPS, STPS, LTPS     | No                  | 6 functions;<br>1-minus exp best fit; | VE = 1 - exp(A+B*Years);<br>A = log(0.3912), B = 0.0805;<br><br>And likelihood ratios: 1.269 (50-59), 1.275 (60-64), 1.22 (65-69), 0.853 (70-74), 0.712 (75-79), 0.392 (80-84), 0.258 (≥85)                                                                                                                                      |                                                                                                                                                                                                                                                                                                                                  |
| Ortega-Sanchez (2021) <sup>17</sup> | NA                  | NA                  | NA                                    | NA                                                                                                                                                                                                                                                                                                                               | NA                                                                                                                                                                                                                                                                                                                               |
| Ultsch et al (2017) <sup>18</sup>   | SPS, STPS, LTPS     | PHN                 | Linear                                | 0.69 (Year 1), 0.50 (Year 2), 0.39 (Year 3), 0.35 (Year 4), 0.37 (Year 5), 0.33 (Year 6), 0.17 (Year 7)                                                                                                                                                                                                                          | 0.83 (Year 1), 0.70 (Year 2), 0.38 (Year 3)                                                                                                                                                                                                                                                                                      |

- 22 BOI: burden of illness; HZ: herpes zoster; I: Intercept; LTPS: Long-Term Persistence Substudy; NA: not applicable; PHN: post-herpetic neuralgia;
- 23 RCT: randomized controlled trial; RWE: real-world evidence; S: Slope; SPS: Shingles Prevention Study; STPS: Short-Term Persistence Substudy;
- 24 ZEST: Zoster Efficacy, Safety, and Tolerability; ZVL: zoster vaccine live; Y: year

25

26 **Table B4: Direct cost model inputs**

| Author/year                                | Price RZV (per dose) | Price RZV source   | Price ZVL | Price ZVL source       | Admin cost | Cost HZ by age group (without complications unless otherwise specified) | Cost PHN by age group                                                             | Cost complications by age group                                                                                                         | Inpatient/outpatient/misc costs by age group (per HZ case unless otherwise specified) | Cost AE by age group                                                                                                                                        | Other cost relevant data (per HZ case unless otherwise specified) |
|--------------------------------------------|----------------------|--------------------|-----------|------------------------|------------|-------------------------------------------------------------------------|-----------------------------------------------------------------------------------|-----------------------------------------------------------------------------------------------------------------------------------------|---------------------------------------------------------------------------------------|-------------------------------------------------------------------------------------------------------------------------------------------------------------|-------------------------------------------------------------------|
| <b>Le and Rothberg (2018)<sup>1</sup></b>  | 140                  | Assumed            | 212.67    | CDC vaccine price list | 26         | 412 (all ages)                                                          | 812 (all ages)                                                                    | Ophthalmic: 16147;<br>Aural: 512;<br>HZ hospitalization: 8656;<br>Serious reaction 6710 (all ages)                                      |                                                                                       |                                                                                                                                                             |                                                                   |
| <b>You et al (2018)<sup>2</sup></b>        | 104                  | Estimated from ZVL | NA        | Market                 |            | 309 (all ages)                                                          | 40 per month (all ages); own estimation 567 (50-59), 673 (≥60)                    | Serious reaction 900;<br>Ophthalmic 3068;<br>SSTI 1900;<br>Ramsay Hunt Syndrome 6597;<br>Disseminated HZ 6299;<br>CNSI 26269 (all ages) |                                                                                       |                                                                                                                                                             |                                                                   |
| <b>Curran et al (2018)<sup>3</sup></b>     | 140                  | Assumed            | 196.91    | CDC vaccine price list | 20         | 876.4 (50-59), 1065.48 (60-69), 1355.32 (≥70)                           | 2577.04 (50-59), 2574.02 (60-69), 5144.53 (≥70) (including the costs of acute HZ) | Ocular 3042.17;<br>Neurological 7213.61;<br>Cutaneous 7214.59;<br>Other non-pain 7623.38 (all ages)                                     |                                                                                       | RZV: 24.08 (50-59), 21.52 (60-64), 21.05 (65-69), 19.60 (70-79), 19.53 (≥80);<br>ZVL: 13.42 (50-59), 10.28 (60-64), 10.01 (65-69), 9.82 (70-79), 9.78 (≥80) |                                                                   |
| <b>Le and Rothberg (2018b)<sup>4</sup></b> | 140                  | Assumed            | NA        | CDC vaccine price list | 26         | 412 (all ages)                                                          | 812 (all ages)                                                                    | Ophthalmic 16147;<br>Aural 512;<br>HZ hospitalization 8656;                                                                             |                                                                                       |                                                                                                                                                             |                                                                   |

| Author/year                                  | Price RZV (per dose) | Price RZV source       | Price ZVL      | Price ZVL source       | Admin cost | Cost HZ by age group (without complications unless otherwise specified)                                                        | Cost PHN by age group                                                             | Cost complications by age group                                                                     | Inpatient/outpatient/misc costs by age group (per HZ case unless otherwise specified)                                                                             | Cost AE by age group                                                                                                                                        | Other cost relevant data (per HZ case unless otherwise specified)                                                                                                   |
|----------------------------------------------|----------------------|------------------------|----------------|------------------------|------------|--------------------------------------------------------------------------------------------------------------------------------|-----------------------------------------------------------------------------------|-----------------------------------------------------------------------------------------------------|-------------------------------------------------------------------------------------------------------------------------------------------------------------------|-------------------------------------------------------------------------------------------------------------------------------------------------------------|---------------------------------------------------------------------------------------------------------------------------------------------------------------------|
|                                              |                      |                        |                |                        |            |                                                                                                                                |                                                                                   | Serious reaction 6710 (all ages)                                                                    |                                                                                                                                                                   |                                                                                                                                                             |                                                                                                                                                                     |
| <b>de Boer et al (2018)<sup>5</sup></b>      | 54.5 (70 YOA)        | Max price at threshold | 51.37 (60 YOA) | Max price at threshold | 11.36      | Own estimate from source data per case of HZ with or without PHN: 182.22 (50-59), 234.58 (60-69), 245.12 (70-79), 271.98 (≥80) | Not estimated explicitly                                                          |                                                                                                     | Hospitalization: 2856 (50-59), 3632 (60-69), 3671 (70-79), 4504 (≥80);<br>One-day hospitalization: 282 (all ages);<br>GP/specialist visits: 158 50-59), 198 (≥60) |                                                                                                                                                             | Patient costs:<br>OTC medication 10.42 (50-59), 12.65 (≥ 60);<br>Travel to GP 3.33 (50-59), 4.07 (≥ 60);<br>Travel to hospital 5.79;<br>Travel to vaccination: 0.43 |
| <b>Van Oorschot et al (2019)<sup>6</sup></b> | 110                  | Assumed                | NA             | NA                     | 7.55       | 226 (60-69), 203 (70-79), 320 (≥80)                                                                                            | 1349 (60-69), 1172 (70-79), 642 (≥80)                                             |                                                                                                     |                                                                                                                                                                   | 1.86 (60-64), 1.86 (65-69), 1.81 (70-79), 1.85 (≥80)                                                                                                        |                                                                                                                                                                     |
| <b>Curran et al (2019)<sup>7</sup></b>       | 140                  | Assumed                | 196.91         | CDC vaccine price list | 20         | 876.4 (50-59), 1065.48 (60-69), 1355.32 (≥70)                                                                                  | 2577.04 (50-59), 2574.02 (60-69), 5144.53 (≥70) (including the costs of acute HZ) | Ocular 3042.17;<br>Neurological 7213.61;<br>Cutaneous 7214.59;<br>Other non-pain 7623.38 (all ages) |                                                                                                                                                                   | RZV: 24.08 (50-59), 21.52 (60-64), 21.05 (65-69), 19.60 (70-79), 19.53 (≥80);<br>ZVL: 13.42 (50-59), 10.28 (60-64), 10.01 (65-69), 9.82 (70-79), 9.78 (≥80) |                                                                                                                                                                     |

| Author/year                                | Price RZV (per dose)  | Price RZV source   | Price ZVL     | Price ZVL source       | Admin cost | Cost HZ by age group (without complications unless otherwise specified) | Cost PHN by age group                                          | Cost complications by age group                                                                      | Inpatient/outpatient/misc costs by age group (per HZ case unless otherwise specified) | Cost AE by age group                                                                               | Other cost relevant data (per HZ case unless otherwise specified)      |
|--------------------------------------------|-----------------------|--------------------|---------------|------------------------|------------|-------------------------------------------------------------------------|----------------------------------------------------------------|------------------------------------------------------------------------------------------------------|---------------------------------------------------------------------------------------|----------------------------------------------------------------------------------------------------|------------------------------------------------------------------------|
| <b>You et al (2019)<sup>8</sup></b>        | 80-100-120            | Estimated from ZVL | NA            | Market                 |            | 309 (all ages)                                                          | 40 per month (all ages); own estimation 567 (50-59), 673 (≥60) | Inpatient 2887; Ophthalmic 3068; SSTI 1900; Oticus 6597; Disseminated HZ 6299; CNSI 26269 (all ages) |                                                                                       |                                                                                                    |                                                                        |
| <b>Prosser et al (2019)<sup>9</sup></b>    | 140                   | Published          | 223           | Published              | 25.42      | 1684 (50-59), 1284 (60-69), 1688 (70-79), 2064 (≥80)                    | 6255 (50-59), 4885 (60-69), 6186 (70-79), 7849 (≥80)           | Ocular 3765; Neurological 6604; Skin complications 5159; Other non-pain 7623.38 (all ages)           |                                                                                       |                                                                                                    |                                                                        |
| <b>Shiragami et al (2019)<sup>10</sup></b> | 12960                 | Assumed            | NA            | NA                     | 3424       | 38471 (all ages)                                                        | 127079 (all ages) (including the costs of acute HZ)            | 72789 (all ages) (including the costs of acute HZ)                                                   |                                                                                       | Own estimation using AE frequencies and cost by type reported: 162 (50-59), 148 (60-69), 156 (≥70) |                                                                        |
| <b>Hoshi et al (2019)<sup>11</sup></b>     | 15000                 | CDC list price     | 8000          | Ad hoc online survey   | Include    | 36615 (65-69), 38414 (70-79), 33853 (≥80)                               | 123988 (65-69), 82502 (70-79), 113304 (≥80)                    |                                                                                                      |                                                                                       |                                                                                                    |                                                                        |
| <b>Carpenter et al (2019)<sup>12</sup></b> | 102.19                | CDC list price     | 134.16        | CDC vaccine price list | 20.88      | 957 (all ages)                                                          | 5831 (all ages)                                                | Ocular 4163 (all ages)                                                                               |                                                                                       |                                                                                                    |                                                                        |
| <b>Drolet et al (2019)<sup>13</sup></b>    | 50-100 (PSA approach) |                    | 100-200 (PSA) | Assumed                | Assumed    | Not hospitalized HZ: 136 (all ages)                                     | Not hospitalized PHN: 1588 (all ages)                          |                                                                                                      | Hospitalization: 918 per day; GP consultation: 28 per visit                           |                                                                                                    | Length of hospitalization (days): 9.3 (50-54), 11.1 (55-64), 12.6 (65- |



| Author/year                        | Price RZV (per dose) | Price RZV source | Price ZVL | Price ZVL source                                   | Admin cost                            | Cost HZ by age group (without complications unless otherwise specified)                                                                                                                                                                                                                               | Cost PHN by age group                                                                                                                                                                                                                                                        | Cost complications by age group | Inpatient/outpatient/misc costs by age group (per HZ case unless otherwise specified)                            | Cost AE by age group                                  | Other cost relevant data (per HZ case unless otherwise specified)              |
|------------------------------------|----------------------|------------------|-----------|----------------------------------------------------|---------------------------------------|-------------------------------------------------------------------------------------------------------------------------------------------------------------------------------------------------------------------------------------------------------------------------------------------------------|------------------------------------------------------------------------------------------------------------------------------------------------------------------------------------------------------------------------------------------------------------------------------|---------------------------------|------------------------------------------------------------------------------------------------------------------|-------------------------------------------------------|--------------------------------------------------------------------------------|
|                                    |                      |                  | approach) |                                                    |                                       |                                                                                                                                                                                                                                                                                                       |                                                                                                                                                                                                                                                                              |                                 | Own estimation using mean hospitalization length (days): 8537 (50-54), 10190 (55-64), 11567 (65-74), 16524 (≥75) |                                                       | 74), 18 (≥75); Consultations: 1.7 (50-54), 2.0 (55-64), 2.3 (65-74), 2.6 (≥75) |
| McGirr et al (2019) <sup>14</sup>  | 122                  | Assumed          | 176.77    | Intelligent Medical Software Canada price list     | 4.50 (first dose); 9.60 (second dose) | 264 (50-64), 301 (≥65)                                                                                                                                                                                                                                                                                | 921 (50-64), 1639 (≥65)                                                                                                                                                                                                                                                      |                                 |                                                                                                                  |                                                       |                                                                                |
| Curran et al (2021) <sup>15</sup>  | 110 (133.62)         | Legacy (update)  | NA        | NA                                                 | 7.55                                  | 193 (50-59), 226 (60-69), 203 (70-79), 320 (≥80)                                                                                                                                                                                                                                                      | 872 (50-59), 1349 (60-69), 1172 (70-79), 642 (≥80)                                                                                                                                                                                                                           |                                 |                                                                                                                  | 1.86 (60-64), 1.86 (65-69), 1.81 (70-79), 1.85 (≥80); |                                                                                |
| Pieters et al (2022) <sup>16</sup> | 140.26               | CDC list price   | 137.4     | Belgian Center for Pharmacotherapeutic Information | 26.78                                 | Ambulatory: 26.78 (no pain), 85.81 (mild), 204.91 (moderate), 208.22 (severe); Hospitalized: 5334.27 (no pain), 5330.19 (mild), 5560.45 (moderate), 6151.53 (severe);<br><br>Own estimation from intensity of pain as reported for ambulatory and hospitalized HZ patients: 216 (50-59), 250 (60-64), | Ambulatory: 457.49 (moderate), 710.02 (severe); Hospitalized: 6241.50 (moderate), 10411.39 (severe)<br><br>Own estimation from intensity of pain as reported for ambulatory and hospitalized and PHN patients: 662 (50-59), 701 (60-64), 730 (65-69), 810 (70-79), 966 (≥80) |                                 |                                                                                                                  |                                                       |                                                                                |

| Author/year                               | Price RZV (per dose) | Price RZV source       | Price ZVL | Price ZVL source | Admin cost | Cost HZ by age group (without complications unless otherwise specified) | Cost PHN by age group                              | Cost complications by age group | Inpatient/outpatient/misc costs by age group (per HZ case unless otherwise specified) | Cost AE by age group | Other cost relevant data (per HZ case unless otherwise specified) |
|-------------------------------------------|----------------------|------------------------|-----------|------------------|------------|-------------------------------------------------------------------------|----------------------------------------------------|---------------------------------|---------------------------------------------------------------------------------------|----------------------|-------------------------------------------------------------------|
|                                           |                      |                        |           |                  |            | 276 (65-69), 355 (70-79), 489 (≥80)                                     |                                                    |                                 |                                                                                       |                      |                                                                   |
| <b>Ortega-Sanchez (2021)<sup>17</sup></b> | 162                  | CDC vaccine price list |           |                  |            | CDC Model: 1549<br>GSK Model: 3578                                      | CDC Model: 4906<br>GSK Model: 8513                 |                                 | CDC model hospitalization: 37852 (no PHN complications)                               |                      |                                                                   |
| <b>Ultsch et al (2017)<sup>18</sup></b>   | 84                   | rote-liste.de          | 175       | rote-liste.de    | 7          | 193 (50-59), 226 (60-69), 203 (70-79), 320 (≥80)                        | 872 (50-59), 1349 (60-69), 1172 (70-79), 642 (≥80) |                                 |                                                                                       |                      |                                                                   |

27

28 All costs are reported in the corresponding study currency as stated in Table 3; AE: adverse events; CDC: Centers for Disease Control and Prevention;

29 CNSI: central nervous system infection; GP: general practitioner; HZ: herpes zoster; Misc: miscellaneous; NA: not applicable; PHN: post-herpetic

30 neuralgia; PSA: probabilistic sensitivity analysis; RZV: recombinant zoster vaccine; SSTI: skin and soft tissue infection; YOA: years of age; ZVL:

31 zoster vaccine live

32

33 **Table B5: Indirect cost model inputs**

| Author/year                                  | Indirect cost type                                         | Indirect cost by age group (per HZ case unless otherwise specified)                                                                                                                   | Time to seek care (in days unless otherwise specified)                                                                       |
|----------------------------------------------|------------------------------------------------------------|---------------------------------------------------------------------------------------------------------------------------------------------------------------------------------------|------------------------------------------------------------------------------------------------------------------------------|
| <b>Le and Rothberg (2018)<sup>1</sup></b>    | Productivity losses                                        | 4915 (60-64), 4632 (≥65)                                                                                                                                                              |                                                                                                                              |
| <b>You et al (2018)<sup>2</sup></b>          | Productivity losses, life-time earnings loss               | Own estimation from labor force participation by gender, unemployment rate, median monthly earnings, and length of hospitalization: 254 (50-54), 215 (55-59), 105 (60-64), 24 (65-69) | HZ without complications: 5;<br>Ophthalmic: 5;<br>SSTI: 3;<br>Ramsay Hunt Syndrome: 11;<br>Disseminated HZ: 10;<br>CNSI: 43  |
| <b>Curran et al (2018)<sup>3</sup></b>       | Productivity losses                                        | 1689.17 (50-59); 2269.10 (60-64); 1220.51 (65-69); 455.19 (70-79); 313.05 (≥80)                                                                                                       |                                                                                                                              |
| <b>Le and Rothberg (2018b)<sup>4</sup></b>   | Productivity losses                                        | 4915 (60-64), 4632 (≥65)                                                                                                                                                              |                                                                                                                              |
| <b>de Boer et al (2018)<sup>5</sup></b>      | Productivity losses, HZ death (friction period of 84 days) | HZ: 398 (50-59), 136 (60-69);<br>Death: 14937 (50-59), 5074 (60-69)                                                                                                                   |                                                                                                                              |
| <b>Van Oorschot et al (2019)<sup>6</sup></b> | Productivity losses                                        | HZ: 112 (60-69), 11 (70-79); 11 (≥80)<br>PHN: 788 (60-69), 46 (70-79); 34 (≥80)                                                                                                       |                                                                                                                              |
| <b>Curran et al (2019)<sup>7</sup></b>       | Productivity losses                                        | 1687.19 (50-59); 2269.10 (60-64); 1220.51 (65-69); 455.19 (70-79); 313.05 (≥80)                                                                                                       |                                                                                                                              |
| <b>You et al (2019)<sup>8</sup></b>          | Productivity losses                                        | Own estimation from labor force participation by gender, unemployment rate, median monthly earnings, and length of hospitalization: 254 (50-54), 215 (55-59), 105 (60-64), 24 (65-69) | HZ without complications: 5;<br>Ophthalmic: 5;<br>SSTI: 3;<br>Ramsay Hunt Syndrome: 11;<br>Disseminated HZ: 10;<br>CNSI: 43; |
| <b>Prosser et al (2019)<sup>9</sup></b>      | Productivity losses                                        | HZ: 962 (all ages);<br>PHN: 580 (50-59), 647 (60-69), 715 (70-79), 782 (80-89), 1004 (90-95)                                                                                          |                                                                                                                              |

|                                            |                                          |                                                                                                                                                    |                                                                                                                                                     |
|--------------------------------------------|------------------------------------------|----------------------------------------------------------------------------------------------------------------------------------------------------|-----------------------------------------------------------------------------------------------------------------------------------------------------|
| <b>Shiragami et al (2019)<sup>10</sup></b> | Productivity losses including caretakers | HZ without PHN: 17747 (50-59), 15128 (60-69), 11892 (70-79), 15115 (≥80);<br>HZ with PHN: 57662 (50-59), 32733 (60-69), 20297 (70-79), 19046 (≥80) |                                                                                                                                                     |
| <b>Hoshi et al (2019)<sup>11</sup></b>     | NA                                       |                                                                                                                                                    |                                                                                                                                                     |
| <b>Carpenter et al (2019)<sup>12</sup></b> | Productivity losses                      | Unit cost per hour: 26.61<br>Own estimation from hours lost per HZ and PHN case by severity of pain:<br>994 (50-59), 995 (60-69)                   | By HZ pain severity (in hours):<br>no pain 5, mild 6, moderate 22, severe 61;<br>by PHN pain severity (in hours):<br>mild 4, moderate 30, severe 81 |
| <b>Drolet et al (2019)<sup>13</sup></b>    | NA                                       |                                                                                                                                                    |                                                                                                                                                     |
| <b>McGirr et al (2019)<sup>14</sup></b>    | NA                                       |                                                                                                                                                    |                                                                                                                                                     |
| <b>Curran et al (2021)<sup>15</sup></b>    | Productivity losses                      | HZ without PHN: 112 (50-59), 112 (60-69), 11 (70-79), 11 (≥80);<br>HZ with PHN: 788 (50-59), 788 (60-69), 46 (70-79), 34 (≥80)                     |                                                                                                                                                     |
| <b>Pieters et al (2022)<sup>16</sup></b>   | NA                                       |                                                                                                                                                    |                                                                                                                                                     |
| <b>Ortega-Sanchez (2021)<sup>17</sup></b>  | Productivity losses                      | GSK model: 199 per HZ case                                                                                                                         |                                                                                                                                                     |
| <b>Ultsch et al (2017)<sup>18</sup></b>    | Productivity losses                      | HZ without PHN: 377 (50-59), 112 (60-69), 11 (70-79), 11 (≥80);<br>HZ with PHN: 467 (50-59), 788 (60-69), 46(70-79), 34 (≥80)                      |                                                                                                                                                     |

34

35 All costs are reported in the corresponding study currency as stated in Table 3; CNSI: central nervous system infection; HZ: herpes zoster; NA: not  
36 applicable; PHN: post-herpetic neuralgia; SSTI: skin and soft tissue infection.

37

38 **Table B6: QALY loss and utility model inputs**

| Author/year                                  | QALY loss HZ by age group                                                                                                                                                                                                                                                         | QALY loss PHN by age group                                                                                                                                                                    | Other QALY loss                                 | QALY AE | Additional data                                                                                                                                                                                                                                                                                                                                                                |
|----------------------------------------------|-----------------------------------------------------------------------------------------------------------------------------------------------------------------------------------------------------------------------------------------------------------------------------------|-----------------------------------------------------------------------------------------------------------------------------------------------------------------------------------------------|-------------------------------------------------|---------|--------------------------------------------------------------------------------------------------------------------------------------------------------------------------------------------------------------------------------------------------------------------------------------------------------------------------------------------------------------------------------|
| <b>Le and Rothberg (2018)<sup>1</sup></b>    | 0.013 (60-69), 0.022 (≥70)                                                                                                                                                                                                                                                        | Not explicit; beyond month 6 assuming 77% (23%) of subjects experience mild (severe) pain with an average utility value of 0.670;<br>Own estimation: 0.278 (60-69), 0.321 (70-79), 0.31 (≥80) | Hospitalization: 0.013, serious reaction: 0.008 | Yes     | Utility M 0.827 (60-69), 0.788 (70-79), 0.782 (80-89);<br>utility F 0.811 (60-69), 0.771 (70-79), 0.724 (80-89);<br>PHN duration 6-12 months 21.5% (all ages); ≥ 12 months 31% (< 70), 52% (≥70)                                                                                                                                                                               |
| <b>You et al (2018)<sup>2</sup></b>          | From utility decrement 0.31 and duration (outpatient);<br>From utility decrement 0.42 and duration (inpatient without complications);<br>From utility decrement 0.75 and duration (inpatient with complications);<br>Own estimation: 0.0256 (50-69); 0.0257 (70-79), 0.0258 (≥80) | From utility decrement 0.42 and PHN duration;<br>Own estimation: 0.471 (50-59), 0.491 (≥ 60)                                                                                                  |                                                 | Yes     | Utility M 0.92 (50-54), 0.92 (55-64), 0.84 (≥65);<br>Utility F 0.92 (50-54), 0.84 (55-64), 0.84 (≥65);<br>PHN duration from monthly probabilities of PHN to persist beyond 12 months:<br>$P(t) = 1 - \exp[\lambda \times (t - 1)^\gamma - \lambda \times t^\gamma]$ with<br>$\lambda = 0.06203$ , $\gamma = 0.51101$ (50-59);<br>$\lambda = 0.2488$ , $\gamma = 0.46843$ (≥60) |
| <b>Curran et al (2018)<sup>3</sup></b>       | Unvaccinated: 0.005 (50-59), 0.010 (60-69), 0.012 (≥70);<br>Vaccinated: 0.005 (50-59), 0.010 (60-69), 0.011 (≥70)                                                                                                                                                                 | Unvaccinated: 0.053 (50-59), 0.106 (60-69), 0.156 (≥70);<br>Vaccinated: 0.049 (50-59), 0.098 (60-69), 0.091 (≥70)                                                                             |                                                 | Yes     | Utility 0.8412 (50-59), 0.827 (60-64), 0.813 (65-69), 0.7886 (70-79), 0.754 (≥80)                                                                                                                                                                                                                                                                                              |
| <b>Le and Rothberg (2018b)<sup>4</sup></b>   | Same as Le and Rothberg (2018) <sup>1</sup>                                                                                                                                                                                                                                       | Same as Le and Rothberg (2018) <sup>1</sup>                                                                                                                                                   | Same as Le and Rothberg (2018) <sup>1</sup>     | Yes     | Same as Le and Rothberg (2018) <sup>1</sup>                                                                                                                                                                                                                                                                                                                                    |
| <b>de Boer et al (2018)<sup>5</sup></b>      | 0.040 (50-59), 0.057 (≥ 60)                                                                                                                                                                                                                                                       | 0.040 (50-59), 0.057 (≥ 60)                                                                                                                                                                   |                                                 | No (*)  | Utility 0.890 (50-64), 0.886 (65-74), 0.83 (≥75)<br>(*) Only is scenario analyses                                                                                                                                                                                                                                                                                              |
| <b>Van Oorschot et al (2019)<sup>6</sup></b> | 0.018 (60-69), 0.019 (≥70)                                                                                                                                                                                                                                                        | 0.158 (all ages)                                                                                                                                                                              |                                                 | Yes     | Utility 0.975 (60-64), 0.976 (65-69), 0.959 (70-79), 0.895 (≥80)                                                                                                                                                                                                                                                                                                               |
| <b>Curran et al (2019)<sup>7</sup></b>       | Same as Curran et al (2018) <sup>3</sup>                                                                                                                                                                                                                                          | Same as Curran et al (2018) <sup>3</sup>                                                                                                                                                      |                                                 | Yes     | Same as Curran et al (2018) <sup>3</sup>                                                                                                                                                                                                                                                                                                                                       |
| <b>You et al (2019)<sup>8</sup></b>          | Same as You et al (2018) <sup>2</sup>                                                                                                                                                                                                                                             | Same as You et al (2018) <sup>2</sup>                                                                                                                                                         |                                                 | Yes     |                                                                                                                                                                                                                                                                                                                                                                                |

| Author/year                                | QALY loss HZ by age group                                                                       | QALY loss PHN by age group                                                                                                                                                                     | Other QALY loss                                                                                        | QALY AE | Additional data                                                                                                                                                                                                                                                                                                                                                                                                                                   |
|--------------------------------------------|-------------------------------------------------------------------------------------------------|------------------------------------------------------------------------------------------------------------------------------------------------------------------------------------------------|--------------------------------------------------------------------------------------------------------|---------|---------------------------------------------------------------------------------------------------------------------------------------------------------------------------------------------------------------------------------------------------------------------------------------------------------------------------------------------------------------------------------------------------------------------------------------------------|
| <b>Prosser et al (2019)<sup>9</sup></b>    | Own estimation:<br>0.0247 (50-59), 0.0240 (60-69), 0.0228 (70-79), 0.0216 (80-89), 0.0214 (≥90) | Own estimation:<br>0.2604 (50-59), 0.2628 (60-69), 0.2585 (70-79), 0.2482 (80-89), 0.2437 (≥90)                                                                                                | Ocular own estimation:<br>0.0705 (50-59), 0.0748 (60-69), 0.0714 (70-79), 0.0664 (80-89), 0.0651 (≥90) | Yes     | Utilities 0.8487 (50-59), 0.8248 (60-69), 0.7849 (70-79), 0.7461 (80-89), 0.74 (90-99);<br>QALD lost HZ 10.62 (50-59), 10.62 (60-69), 10.59 (70-79), 10.59 (80-89), 10.55 (90-99);<br>QALD lost PHN 112 (50-59), 116.3 (60-69), 120.2 (70-79), 121.4 (80-89), 120.2 (90-99);<br>QALD lost ocular 32.3 (50-59), 33.1 (60-69), 33.2 (70-79), 32.5 (80-89), 32.1 (90-99)                                                                             |
| <b>Shiragami et al (2019)<sup>10</sup></b> | 0.014 (50-59), 0.015 (60-69), 0.020 (70-79), 0.017 (≥80)                                        | 0.118 (50-59), 0.135 (60-69), 0.154 (70-79), 0.179 (≥80)                                                                                                                                       |                                                                                                        | Yes     | Utilities 0.962 (50-59), 0.975 (60-69), 0.942 (70-79), 0.883 (≥80)                                                                                                                                                                                                                                                                                                                                                                                |
| <b>Hoshi et al (2019)<sup>11</sup></b>     | 0.00902 (65-69), 0.01367 (70-79), 0.01637 (≥80)                                                 | 0.12017 (65-69), 0.17369 (70-79), 0.23339 (≥80)                                                                                                                                                |                                                                                                        | No      | Utilities 1.0 (all ages)                                                                                                                                                                                                                                                                                                                                                                                                                          |
| <b>Carpenter et al (2019)<sup>12</sup></b> | 0.050 (weighted average value from pain levels)                                                 | Own estimation from PHN QALY losses by pain severity level and the distribution of pain severity in PHN by age<br>0.471 (50-59), 0.506 (60-69), 0.5235 (70-79), 0.5375 (80-84), 0.548 (85-100) | Ocular: 0.24                                                                                           | Yes     | Probability of pain given HZ:<br>no pain 5%, mild 11%, moderate 37%, severe 47%<br>Probability of pain severity given PHN:<br>mild 54%, moderate 23%, severe 23% (50-59);<br>mild 44%, moderate 28%, severe 28% (60-69);<br>mild 49%, moderate 30.5%, severe 30.5% (70-79);<br>mild 35%, moderate 37.5%, severe 37.5% (80-84);<br>mild 32%, moderate 34%, severe 34% (85-100)<br>Utility loss given PHN:<br>mild 0.31, moderate 0.55, severe 0.77 |
| <b>Drolet et al (2019)<sup>13</sup></b>    | 0.009 (50-59), 0.01 (60-69), 0.01 (≥70)                                                         | 0.041 (50-59), 0.192 (60-69), 0.234 (≥70)                                                                                                                                                      |                                                                                                        |         |                                                                                                                                                                                                                                                                                                                                                                                                                                                   |
| <b>McGirr et al (2019)<sup>14</sup></b>    | 0.036 (all ages)                                                                                | 0.1357 (all ages)                                                                                                                                                                              |                                                                                                        | Yes     | Utilities 0.92 (50-59), 0.91 (60-79), 0.88 (≥80)                                                                                                                                                                                                                                                                                                                                                                                                  |
| <b>Curran et al (2021)<sup>15</sup></b>    | 0.018 (50-59), 0.018 (60-69), 0.019 (≥70)                                                       | 0.158 (all ages)                                                                                                                                                                               |                                                                                                        | Yes     | Utilities 0.975 (50-59), 0.975 (60-64), 0.976 (65-69), 0.959 (70-79), 0.895 (≥80)                                                                                                                                                                                                                                                                                                                                                                 |

| Author/year                         | QALY loss HZ by age group                                 | QALY loss PHN by age group                                | Other QALY loss | QALY AE | Additional data                                                                                                                            |
|-------------------------------------|-----------------------------------------------------------|-----------------------------------------------------------|-----------------|---------|--------------------------------------------------------------------------------------------------------------------------------------------|
| Pieters et al (2022) <sup>16</sup>  | Own estimation: 0.00589 (50-69), 0.01173 (≥70)            | Own estimation: 0.20439 (50-69), 0.26133 (≥70)            |                 | No      | Utilities 0.8559 (All ages);<br>HZ duration 28.66 d (<70), 44.38 d (≥70);<br>PHN duration 254.06 d (<70), 319.46 d (≥70)                   |
| Ortega-Sanchez (2021) <sup>17</sup> |                                                           |                                                           |                 |         |                                                                                                                                            |
| Ultsch et al (2017) <sup>18</sup>   | Own estimation: 0.026 (50-60), 0.033 (61-70), 0.031 (>70) | Own estimation: 0.226 (50-60), 0.263 (61-70), 0.296 (>70) |                 |         | Utilities 1.0 (all ages);<br>Utilities HZ 0.68 (50-60), 0.60 (61-70), 0.62 (>70);<br>Utilities PHN 0.725 (50-60), 0.68 (61-70), 0.64 (>70) |

39

40 AE: adverse events; d: day(s); HZ: herpes zoster; M/F: male/female; PHN: post-herpetic neuralgia; QALD: quality-adjusted life-day; QALY: quality-  
41 adjusted life year

42

43 **Table B7: Adverse event model inputs**

| Author/Year                                  | AEs                            | Frequency (% ZVL inoculations)                                                                                                    | Frequency (% RZV inoculations)                                                                                                                                                                      | Duration (days)                  | Utility AE                     | QALY loss AE                                            | Cost AE                                                                                                                                                                                                                                                                                                                  |
|----------------------------------------------|--------------------------------|-----------------------------------------------------------------------------------------------------------------------------------|-----------------------------------------------------------------------------------------------------------------------------------------------------------------------------------------------------|----------------------------------|--------------------------------|---------------------------------------------------------|--------------------------------------------------------------------------------------------------------------------------------------------------------------------------------------------------------------------------------------------------------------------------------------------------------------------------|
| <b>Le and Rothberg (2018)<sup>1</sup></b>    | Local, grade 3, serious        | Local: 34%; grade 3: 0.3%; serious: 0.7%                                                                                          | Local: 39.5%, grade 3: 5.9%, serious: 0.1%;<br><br>Cumulative over two doses:<br>Local: 79.1%, grade 3: 8.5%, serious 0.1%                                                                          | Local: 1; grade 3: 1; serious: 3 | Local: 0.73, grade 3: 0.47     | Calculated implicitly from duration & disutility        |                                                                                                                                                                                                                                                                                                                          |
| <b>You et al (2018)<sup>2</sup></b>          | Local, serious                 |                                                                                                                                   | Not stated explicitly                                                                                                                                                                               | Local: 2; serious: 1.5           | Local: 0.01; serious: 0.5      | Calculated implicitly from duration & disutility        |                                                                                                                                                                                                                                                                                                                          |
| <b>Curran et al (2018)<sup>3</sup></b>       | Local, outpatient, ER, serious | Local: 49.5% (50-59), 31.7% ( $\geq 60$ );<br>outpatient: 0.72% (all ages);<br>ER: 0.02% (all ages);<br>serious: 0.03% (all ages) | Local: 85.3% (50-59), 79.8% (60-69), 68.8% ( $\geq 70$ );<br>outpatient: 1.72% (50-59), 1.38% (60-69), 1.27% ( $\geq 70$ );<br>ER: 0.04% (50-69), 0.18% ( $\geq 70$ );<br>serious: 0.04% (all ages) |                                  |                                | Local: 0.0001 (all ages);<br>serious: 0.0082 (all ages) | Local: 16.48 (all ages);<br>outpatient: 381.08 (50-59), 361.69 (60-64), 336.61 (65-69), 318.30 (70-79), 314.90 ( $\geq 80$ );<br>ER: 876.38 (50-59), 837.60 (60-64), 787.43 (65-69), 750.82 (70-79), 744.02 (80+);<br>serious: 7791.24 (50-59), 7597.32 (60-64), 7346.50 (65-69), 7163.44 (70-79), 7129.44 ( $\geq 80$ ) |
| <b>Le and Rothberg (2018b)<sup>4</sup></b>   | Same as Le and Rothberg (2018) | Same as Le and Rothberg (2018)                                                                                                    | Same as Le and Rothberg (2018)                                                                                                                                                                      | Same as Le and Rothberg (2018)   | Same as Le and Rothberg (2018) | Same as Le and Rothberg (2018)                          |                                                                                                                                                                                                                                                                                                                          |
| <b>de Boer et al (2018)<sup>5</sup></b>      | Grade 3                        |                                                                                                                                   |                                                                                                                                                                                                     |                                  |                                | 0.000329 (RZV),<br>0.000022 (ZVL)                       |                                                                                                                                                                                                                                                                                                                          |
| <b>Van Oorschot et al (2019)<sup>6</sup></b> | Same as Curran et al (2018)    |                                                                                                                                   | Same as Curran et al (2018)                                                                                                                                                                         |                                  |                                | Same as Curran et al (2018)                             | Serious: 1812.97 (all ages);<br>other classes not reported explicitly (local, GP, ER)                                                                                                                                                                                                                                    |



| Author/Year                                | AEs                                            | Frequency (% ZVL inoculations)                                                                                        | Frequency (% RZV inoculations)                                                                                                                                                                      | Duration (days)             | Utility AE               | QALY loss AE                                 | Cost AE                                                                                                                                                                                   |
|--------------------------------------------|------------------------------------------------|-----------------------------------------------------------------------------------------------------------------------|-----------------------------------------------------------------------------------------------------------------------------------------------------------------------------------------------------|-----------------------------|--------------------------|----------------------------------------------|-------------------------------------------------------------------------------------------------------------------------------------------------------------------------------------------|
| <b>Curran et al (2019)<sup>7</sup></b>     | Same as Curran et al (2018)                    | Same as Curran et al (2018)                                                                                           | Same as Curran et al (2018)                                                                                                                                                                         | Same as Curran et al (2018) |                          | Same as Curran et al (2018)                  | Same as Curran et al (2018)                                                                                                                                                               |
| <b>You et al (2019)<sup>8</sup></b>        | Same as You et al (2018)                       |                                                                                                                       | Same as You et al (2018)                                                                                                                                                                            | Same as You et al (2018)    | Same as You et al (2018) | Same as You et al (2018)                     | Injection site reaction: 1                                                                                                                                                                |
| <b>Prosser et al (2019)<sup>9</sup></b>    | Local, systemic (Grade 1-2 or Grade 3), severe | Local grade 1-2: 18%;<br>local grade 3: 0.6%;<br>systemic grade 1-2: 1.4%;<br>systemic grade 3: 0%;<br>severe: 0.005% | Local grade 1-2: 60.5%;<br>local grade 3: 9%;<br>systemic grade 1-2: 27.2%;<br>systemic grade 3: 6.8%;<br>severe: 0.01%                                                                             |                             |                          |                                              | Local grade 3: 20.46 plus GP visit in 5% of cases;<br>systemic grade 3: 44.14 plus GP visit in 5% of cases, ER visit in 3% of cases (additional cost per ER visit: 1000);<br>severe: 5856 |
| <b>Shiragami et al (2019)<sup>10</sup></b> | Local, serious                                 |                                                                                                                       | Local: 85.3% (50-59), 79.8% (60-69), 68.8% ( $\geq 70$ );<br>outpatient: 1.72% (50-59), 1.38% (60-69), 1.27% ( $\geq 70$ );<br>ER: 0.04% (50-69), 0.18% ( $\geq 70$ );<br>Serious: 0.04% (all ages) |                             |                          | Local: 0.0001;<br>hospitalized: 0.0082       | Outpatient: 3957.5;<br>ER: 8757.5;<br>hospitalized: 225750                                                                                                                                |
| <b>Hoshi et al (2019)<sup>11</sup></b>     | Grade 3 systemic                               | 2%                                                                                                                    | 10.80%                                                                                                                                                                                              |                             |                          |                                              |                                                                                                                                                                                           |
| <b>Carpenter et al (2019)<sup>12</sup></b> | Local, serious                                 | Local 31.7%;<br>serious 0.1%                                                                                          | Local 66.9%;<br>serious 0.058%                                                                                                                                                                      |                             |                          | Local 0.001; serious 2.13E-5 (per dose both) | Serious 9778.32                                                                                                                                                                           |
| <b>Drolet et al (2019)<sup>13</sup></b>    |                                                |                                                                                                                       |                                                                                                                                                                                                     |                             |                          |                                              | RZV: 2.88 (50-59), 2.62 (60-64), 2.89 (65-69), 2.81 ( $\geq 70$ );<br>ZVL: 1.70 (all ages)                                                                                                |
| <b>McGirr et al (2019)<sup>14</sup></b>    | Same as Curran et al (2018)                    | Same as Curran et al (2018)                                                                                           | Same as Curran et al (2018)                                                                                                                                                                         |                             |                          | Same as Curran et al (2018)                  |                                                                                                                                                                                           |
| <b>Curran et al (2021)<sup>15</sup></b>    | Same as Curran et al (2018)                    |                                                                                                                       | Same as Curran et al (2018)                                                                                                                                                                         |                             |                          | Same as Curran et al (2018)                  |                                                                                                                                                                                           |

| Author/Year                         | AEs             | Frequency (% ZVL inoculations) | Frequency (% RZV inoculations) | Duration (days) | Utility AE | QALY loss AE | Cost AE |
|-------------------------------------|-----------------|--------------------------------|--------------------------------|-----------------|------------|--------------|---------|
| Pieters et al (2022) <sup>16</sup>  | NA              |                                |                                |                 |            |              |         |
| Ortega-Sanchez (2021) <sup>17</sup> |                 |                                |                                |                 |            |              |         |
| Ultsch et al (2017) <sup>18</sup>   | Local, systemic | Not quantified                 | Local 81%, systemic 20%        |                 |            |              |         |

44

45 All costs are reported in the corresponding study currency as stated in Table 3; AE: adverse event; ER: emergency room; Freq: Frequency; GP: general  
 46 practitioner; NA: not applicable; RZV: recombinant zoster vaccine; QALY: quality-adjusted life year; ZVL: zoster vaccine live

47

48 **Table B8: Detailed cost-effectiveness results**

| Author/year                                | Cohort | Perspective | Determinant | Comparator | ICER        | Price RZV (per dose) | Price ZVL      | Notes           |
|--------------------------------------------|--------|-------------|-------------|------------|-------------|----------------------|----------------|-----------------|
| <b>Le and Rothberg (2018)<sup>1</sup></b>  | 60     | Societal    | RZV         | ZVL        | Cost-saving | \$140 (USD)          | \$212.67 (USD) |                 |
|                                            | 70     | Societal    | RZV         | ZVL        | Cost-saving | \$140 (USD)          | \$212.67 (USD) |                 |
|                                            | 80     | Societal    | RZV         | ZVL        | Cost-saving | \$140 (USD)          | \$212.67 (USD) |                 |
|                                            | 60     | Societal    | RZV         | Control    | 30.1 K      | \$140 (USD)          | NA             |                 |
|                                            | 70     | Societal    | RZV         | Control    | 20.0 K      | \$140 (USD)          | NA             |                 |
|                                            | 80     | Societal    | RZV         | Control    | 21.7 K      | \$140 (USD)          | NA             |                 |
| <b>You et al (2018)<sup>2</sup></b>        | 50     | Societal    | RZV         | Control    | 64.3 K      | \$104 (USD)          | NA             |                 |
|                                            | 60     | Societal    | RZV         | Control    | 47.4 K      | \$104 (USD)          | NA             |                 |
|                                            | 70     | Societal    | RZV         | Control    | 46.3 K      | \$104 (USD)          | NA             |                 |
| <b>Curran et al (2018)<sup>3</sup></b>     | 60+    | Societal    | RZV         | ZVL        | Cost-saving | \$140 (USD)          | \$196.91 (USD) |                 |
|                                            | 60+    | Societal    | RZV         | Control    | 11.9 K      | \$140 (USD)          | NA             |                 |
|                                            | 50     | Societal    | RZV         | Control    | 14.9 K      | \$140 (USD)          | NA             |                 |
|                                            | 60     | Societal    | RZV         | Control    | Cost-saving | \$140 (USD)          | NA             |                 |
|                                            | 65     | Societal    | RZV         | Control    | 4.6 K       | \$140 (USD)          | NA             |                 |
|                                            | 70     | Societal    | RZV         | Control    | 20.4 K      | \$140 (USD)          | NA             |                 |
|                                            | 80     | Societal    | RZV         | Control    | 56.1 K      | \$140 (USD)          | NA             |                 |
| <b>Le and Rothberg (2018b)<sup>4</sup></b> | 50     | Societal    | RZV         | Control    | 125.0 K     | \$140 (USD)          | NA             | 100% compliance |

| Author/year                                  | Cohort | Perspective | Determinant | Comparator | ICER    | Price RZV (per dose) | Price ZVL | Notes           |
|----------------------------------------------|--------|-------------|-------------|------------|---------|----------------------|-----------|-----------------|
|                                              | 55     | Societal    | RZV         | Control    | 60.0 K  | \$140 (USD)          | NA        | 100% compliance |
|                                              | 59     | Societal    | RZV         | Control    | 27.0 K  | \$140 (USD)          | NA        | 100% compliance |
|                                              | 50     | Societal    | RZV         | Control    | 150.0 K | \$140 (USD)          | NA        | 56% compliance  |
|                                              | 55     | Societal    | RZV         | Control    | 75.0 K  | \$140 (USD)          | NA        | 56% compliance  |
|                                              | 59     | Societal    | RZV         | Control    | 37.5 K  | \$140 (USD)          | NA        | 56% compliance  |
| <b>de Boer et al (2018)<sup>5</sup></b>      | 50     | Societal    | RZV         | Control    | 20.0 K  | €31.84               | NA        |                 |
|                                              | 60     | Societal    | RZV         | Control    | 20.0 K  | €52.15               | NA        |                 |
|                                              | 70     | Societal    | RZV         | Control    | 20.0 K  | €54.54               | NA        |                 |
|                                              | 80     | Societal    | RZV         | Control    | 20.0 K  | €53.01               | NA        |                 |
|                                              | 50     | Societal    | ZVL         | Control    | 20.0 K  | NA                   | €29.6     |                 |
|                                              | 60     | Societal    | ZVL         | Control    | 20.0 K  | NA                   | €51.4     |                 |
|                                              | 70     | Societal    | ZVL         | Control    | 20.0 K  | NA                   | €27.5     |                 |
|                                              | 80     | Societal    | ZVL         | Control    | 20.0 K  | NA                   | €0.7      |                 |
|                                              | 50     | Societal    | ZVL+booster | Control    | 20.0 K  | NA                   | €27.1     |                 |
|                                              | 60     | Societal    | ZVL+booster | Control    | 20.0 K  | NA                   | €37.8     |                 |
|                                              | 70     | Societal    | ZVL+booster | Control    | 20.0 K  | NA                   | €19.4     |                 |
|                                              | 80     | Societal    | ZVL+booster | Control    | 20.0 K  | NA                   | €-1.5     |                 |
| <b>Van Oorschot et al (2019)<sup>6</sup></b> | 60+    | Societal    | RZV         | Control    | 37.0 K  | €110                 | NA        |                 |
|                                              | 70+    | Societal    | RZV         | Control    | 44.0 K  | €110                 | NA        |                 |

| Author/year                       | Cohort    | Perspective | Determinant | Comparator | ICER                        | Price RZV (per dose) | Price ZVL      | Notes             |
|-----------------------------------|-----------|-------------|-------------|------------|-----------------------------|----------------------|----------------|-------------------|
|                                   | 60        | Societal    | RZV         | Control    | 29.5 K                      | €110                 | NA             |                   |
|                                   | 65        | Societal    | RZV         | Control    | 29.5 K                      | €110                 | NA             |                   |
|                                   | 70        | Societal    | RZV         | Control    | 39.3 K                      | €110                 | NA             |                   |
| Curran et al (2019) <sup>7</sup>  | 60+       | Societal    | RZV         | Control    | 58.8 K                      | \$140 (USD)          | NA             |                   |
|                                   | 60+       | Societal    | RZV         | ZVL        | Cost-saving                 | \$140 (USD)          | \$196.91 (USD) |                   |
| You et al (2019) <sup>8</sup>     | Various M | Societal    | RZV         | Control    | Below WTP between 54-74 YOA | \$100 (USD)          | NA             | Tabulated data NA |
|                                   | Various M | Societal    | RZV         | Control    | Below WTP between 50-80 YOA | \$80 (USD)           | NA             | Tabulated data NA |
|                                   | Various F | Societal    | RZV         | Control    | Below WTP between 50-79 YOA | \$100 (USD)          | NA             | Tabulated data NA |
|                                   | Various F | Societal    | RZV         | Control    | Below WTP between 50-80 YOA | \$80 (USD)           | NA             | Tabulated data NA |
|                                   | Various F | Societal    | RZV         | Control    | Below WTP between 58-72 YOA | \$120 (USD)          | NA             | Tabulated data NA |
| Prosser et al (2019) <sup>9</sup> | 50-59     | Societal    | RZV         | Control    | 46.8 K                      | \$140 (USD)          | \$223 (USD)    |                   |
|                                   | 60-69     | Societal    | RZV         | Control    | 25.7 K                      | \$140 (USD)          | \$223 (USD)    |                   |
|                                   | 70-79     | Societal    | RZV         | Control    | 11.6 K                      | \$140 (USD)          | \$223 (USD)    |                   |
|                                   | 80-99     | Societal    | RZV         | Control    | 9.7 K                       | \$140 (USD)          | \$223 (USD)    |                   |

| Author/year                                | Cohort | Perspective | Determinant | Comparator | ICER      | Price RZV (per dose) | Price ZVL   | Notes |
|--------------------------------------------|--------|-------------|-------------|------------|-----------|----------------------|-------------|-------|
|                                            | 90-99  | Societal    | RZV         | Control    | 27.3 K    | \$140 (USD)          | \$223 (USD) |       |
|                                            | 60+    | Societal    | RZV         | Control    | 19K       | \$140 (USD)          | \$223 (USD) |       |
|                                            | 50-59  | Healthcare  | RZV         | Control    | 60.8 K    | \$140 (USD)          | \$223 (USD) |       |
|                                            | 60-69  | Healthcare  | RZV         | Control    | 37.1 K    | \$140 (USD)          | \$223 (USD) |       |
|                                            | 70-79  | Healthcare  | RZV         | Control    | 20.3 K    | \$140 (USD)          | \$223 (USD) |       |
|                                            | 80-99  | Healthcare  | RZV         | Control    | 16.5 K    | \$140 (USD)          | \$223 (USD) |       |
|                                            | 90-99  | Healthcare  | RZV         | Control    | 32.4 K    | \$140 (USD)          | \$223 (USD) |       |
|                                            | 60+    | Healthcare  | RZV         | Control    | 28.7 K    | \$140 (USD)          | \$223 (USD) |       |
|                                            | 50-59  | Societal    | RZV         | ZVL 1 year | 97.0 K    | \$140 (USD)          | \$223 (USD) |       |
|                                            | 60-69  | Societal    | RZV         | ZVL 1 year | 51.4 K    | \$140 (USD)          | \$223 (USD) |       |
|                                            | 70-79  | Societal    | RZV         | ZVL 1 year | 23.1 K    | \$140 (USD)          | \$223 (USD) |       |
|                                            | 80-99  | Societal    | RZV         | ZVL 1 year | 12.5 K    | \$140 (USD)          | \$223 (USD) |       |
|                                            | 90-99  | Societal    | RZV         | ZVL 1 year | 27.3 K    | \$140 (USD)          | \$223 (USD) |       |
|                                            | 50-59  | Societal    | RZV         | ZVL 5 year | 64.3 K    | \$140 (USD)          | \$223 (USD) |       |
|                                            | 60-69  | Societal    | RZV         | ZVL 5 year | 33.4 K    | \$140 (USD)          | \$223 (USD) |       |
|                                            | 70-79  | Societal    | RZV         | ZVL 5 year | 13.2 K    | \$140 (USD)          | \$223 (USD) |       |
|                                            | 80-99  | Societal    | RZV         | ZVL 5 year | 9.7 K     | \$140 (USD)          | \$223 (USD) |       |
|                                            | 90-99  | Societal    | RZV         | ZVL 5 year | 27.3 K    | \$140 (USD)          | \$223 (USD) |       |
| <b>Shiragami et al (2019)<sup>10</sup></b> | 65+    | Payer       | RZV         | Control    | 4,316.5 K | ¥12,960              | NA          |       |

| Author/year                                | Cohort | Perspective | Determinant | Comparator | ICER      | Price RZV (per dose) | Price ZVL | Notes |
|--------------------------------------------|--------|-------------|-------------|------------|-----------|----------------------|-----------|-------|
|                                            | 50+    | Payer       | RZV         | Control    | 4,518.5 K | ¥12,960              | NA        |       |
|                                            | 60+    | Payer       | RZV         | Control    | 4,336.2 K | ¥12,960              | NA        |       |
|                                            | 70+    | Payer       | RZV         | Control    | 4,374.2 K | ¥12,960              | NA        |       |
|                                            | 65+    | Societal    | RZV         | Control    | 4,036.0 K | ¥12,960              | NA        |       |
|                                            | 50+    | Societal    | RZV         | Control    | 4,144.4 K | ¥12,960              | NA        |       |
|                                            | 60+    | Societal    | RZV         | Control    | 4,034.6 K | ¥12,960              | NA        |       |
|                                            | 70+    | Societal    | RZV         | Control    | 4,117.8 K | ¥12,960              | NA        |       |
| <b>Hoshi et al (2019)<sup>11</sup></b>     | 80-84  | Payer       | ZVL         | Control    | 2,633.6 K | ¥15,000              | NA        |       |
|                                            | 75-84  | Payer       | ZVL         | Control    | 2,902.1 K | ¥15,000              | NA        |       |
|                                            | 70-84  | Payer       | ZVL         | Control    | 2,961.0 K | ¥15,000              | NA        |       |
|                                            | 65-84  | Payer       | ZVL         | Control    | 3,434.3 K | ¥15,000              | NA        |       |
|                                            | 80-84  | Payer       | RZV         | Control    | 5,262.2 K | ¥15,000              | NA        |       |
|                                            | 75-84  | Payer       | RZV         | Control    | 5,561.5 K | ¥15,000              | NA        |       |
|                                            | 70-84  | Payer       | RZV         | Control    | 5,629.6 K | ¥15,000              | NA        |       |
|                                            | 65-84  | Payer       | RZV         | Control    | 6,278.6 K | ¥15,000              | NA        |       |
| <b>Carpenter et al (2019)<sup>12</sup></b> | 50     | Societal    | RZV         | Control    | 91.2 K    | \$102.19 (USD)       | NA        |       |
|                                            | 60     | Societal    | RZV         | Control    | 19.3 K    | \$102.19 (USD)       | NA        |       |
|                                            | 70     | Societal    | RZV         | Control    | 1.4 K     | \$102.19 (USD)       | NA        |       |
|                                            | 50     | Societal    | ZVL         | Control    | 118.5 K   | \$102.19 (USD)       | NA        |       |

| Author/year                             | Cohort | Perspective | Determinant | Comparator | ICER    | Price RZV (per dose) | Price ZVL      | Notes |
|-----------------------------------------|--------|-------------|-------------|------------|---------|----------------------|----------------|-------|
|                                         | 60     | Societal    | ZVL         | Control    | 42.7 K  | \$102.19 (USD)       | NA             |       |
|                                         | 70     | Societal    | ZVL         | Control    | 88.3 K  | \$102.19 (USD)       | NA             |       |
| <b>Drolet et al (2019)<sup>13</sup></b> | 50     | Healthcare  | RZV         | Control    | 25.9 K  | \$100 (CAD)          | NA             |       |
|                                         | 60     | Healthcare  | RZV         | Control    | 11.0 K  | \$100 (CAD)          | NA             |       |
|                                         | 65     | Healthcare  | RZV         | Control    | 5.3 K   | \$100 (CAD)          | NA             |       |
|                                         | 70     | Healthcare  | RZV         | Control    | 4.2 K   | \$100 (CAD)          | NA             |       |
|                                         | 75     | Healthcare  | RZV         | Control    | 0.8 K   | \$100 (CAD)          | NA             |       |
|                                         | 80     | Healthcare  | RZV         | Control    | 7.8 K   | \$100 (CAD)          | NA             |       |
|                                         | 85     | Healthcare  | RZV         | Control    | 18.4 K  | \$100 (CAD)          | NA             |       |
|                                         | 50     | Healthcare  | ZVL         | Control    | 130.6 K | NA                   | \$200 (CAD)    |       |
|                                         | 60     | Healthcare  | ZVL         | Control    | 54.8 K  | NA                   | \$200 (CAD)    |       |
|                                         | 65     | Healthcare  | ZVL         | Control    | 36.3 K  | NA                   | \$200 (CAD)    |       |
|                                         | 70     | Healthcare  | ZVL         | Control    | 36.6 K  | NA                   | \$200 (CAD)    |       |
|                                         | 75     | Healthcare  | ZVL         | Control    | 31.1 K  | NA                   | \$200 (CAD)    |       |
|                                         | 80     | Healthcare  | ZVL         | Control    | 47.5 K  | NA                   | \$200 (CAD)    |       |
|                                         | 85     | Healthcare  | ZVL         | Control    | 71.9 K  | NA                   | \$200 (CAD)    |       |
| <b>McGirr et al (2019)<sup>14</sup></b> | 60+    | Healthcare  | RZV         | Control    | 28.4 K  | \$122 (CAD)          | NA             |       |
|                                         | 60+    | Healthcare  | RZV         | ZVL        | 2.4 K   | \$122 (CAD)          | \$176.77 (CAD) |       |
| <b>Curran et al (2021)<sup>15</sup></b> | 50     | Societal    | RZV         | Control    | 29.5 K  | €110                 | NA             |       |



| Author/year                        | Cohort | Perspective | Determinant | Comparator  | ICER        | Price RZV (per dose) | Price ZVL | Notes                    |
|------------------------------------|--------|-------------|-------------|-------------|-------------|----------------------|-----------|--------------------------|
|                                    | 60     | Societal    | RZV         | Control     | 25.5 K      | €110                 | NA        |                          |
|                                    | 65     | Societal    | RZV         | Control     | 26.1 K      | €110                 | NA        |                          |
|                                    | 70     | Societal    | RZV         | Control     | 34.7 K      | €110                 | NA        |                          |
|                                    | 50+    | Societal    | RZV         | Control     | 31.7 K      | €133.62              | NA        |                          |
|                                    | 60+    | Societal    | RZV         | Control     | 33.0 K      | €133.62              | NA        |                          |
|                                    | 70+    | Societal    | RZV         | Control     | 39.7 K      | €133.62              | NA        |                          |
| Pieters et al (2022) <sup>16</sup> | 50     | Healthcare  | RZV         | Control     | 87.4 K      | €140.26              | NA        | RZV VE logarithmic model |
|                                    | 60     | Healthcare  | RZV         | Control     | 108.0 K     | €140.26              | NA        |                          |
|                                    | 70     | Healthcare  | RZV         | Control     | 98.2 K      | €140.26              | NA        |                          |
|                                    | 80     | Healthcare  | RZV         | Control     | 97.5 K      | €140.26              | NA        |                          |
|                                    | 85     | Healthcare  | RZV         | Control     | 125.9 K     | €140.26              | NA        |                          |
|                                    | 50     | Healthcare  | RZV         | ZVL         | Cost-saving | €140.26              | €137.4    |                          |
|                                    | 60     | Healthcare  | RZV         | ZVL         | Cost-saving | €140.26              | €137.4    |                          |
|                                    | 70     | Healthcare  | RZV         | ZVL         | Cost-saving | €140.26              | €137.4    |                          |
|                                    | 80     | Healthcare  | RZV         | ZVL         | Cost-saving | €140.26              | €137.4    |                          |
|                                    | 85     | Healthcare  | RZV         | ZVL         | Cost-saving | €140.26              | €137.4    |                          |
|                                    | 50     | Healthcare  | RZV         | ZVL+booster | Cost-saving | €140.26              | €137.4    |                          |
|                                    | 60     | Healthcare  | RZV         | ZVL+booster | Cost-saving | €140.26              | €137.4    |                          |
|                                    | 70     | Healthcare  | RZV         | ZVL+booster | Cost-saving | €140.26              | €137.4    |                          |

| Author/year                         | Cohort   | Perspective | Determinant | Comparator  | ICER        | Price RZV (per dose) | Price ZVL | Notes                     |
|-------------------------------------|----------|-------------|-------------|-------------|-------------|----------------------|-----------|---------------------------|
|                                     | 80       | Healthcare  | RZV         | ZVL+booster | Cost-saving | €140.26              | €137.4    |                           |
|                                     | 85       | Healthcare  | RZV         | ZVL+booster | Cost-saving | €140.26              | €137.4    |                           |
| Ortega-Sanchez (2021) <sup>17</sup> | CDC      | Healthcare  | RZV         | Control     | Cost-saving | \$162 (USD)          | NA        | HSCT                      |
|                                     | CDC      | Healthcare  | RZV         | Control     | Cost-saving | \$162 (USD)          | NA        | Multiple myeloma          |
|                                     | CDC      | Healthcare  | RZV         | Control     | 10.0 K      | \$162 (USD)          | NA        | Hematologic malignancy    |
|                                     | CDC      | Healthcare  | RZV         | Control     | 79.0 K      | \$162 (USD)          | NA        | HIV                       |
|                                     | CDC      | Healthcare  | RZV         | Control     | 99.0 K      | \$162 (USD)          | NA        | Non-Hogkin lymphoma       |
|                                     | CDC      | Healthcare  | RZV         | Control     | 208.0 K     | \$162 (USD)          | NA        | Autoimmune & Inflammatory |
|                                     | Industry | Societal    | RZV         | Control     | Cost-saving | \$162 (USD)          | NA        | HSCT                      |
|                                     | Industry | Societal    | RZV         | Control     | Cost-saving | \$162 (USD)          | NA        | Renal transplant          |
|                                     | Industry | Societal    | RZV         | Control     | 33.0 K      | \$162 (USD)          | NA        | HIV                       |
|                                     | Industry | Societal    | RZV         | Control     | 68.0 K      | \$162 (USD)          | NA        | Breast cancer             |
|                                     | Industry | Societal    | RZV         | Control     | 96.0 K      | \$162 (USD)          | NA        | Hogkin lymphoma           |
|                                     | Industry | Societal    | RZV         | Control     | 150.0 K     | \$162 (USD)          | NA        | Autoimmune & Inflammatory |
| Ultsch et al (2017) <sup>18</sup>   | 50       | Societal    | RZV         | Control     | 34.3 K      | €84                  | NA        |                           |
|                                     | 60       | Societal    | RZV         | Control     | 23.9 K      | €84                  | NA        |                           |
|                                     | 70       | Societal    | RZV         | Control     | 25.3 K      | €84                  | NA        |                           |
|                                     | 80       | Societal    | RZV         | Control     | 35.7 K      | €84                  | NA        |                           |
|                                     | 50       | Societal    | ZVL         | Control     | 104.8 K     | NA                   | €175      |                           |

| Author/year | Cohort | Perspective | Determinant | Comparator | ICER    | Price RZV (per dose) | Price ZVL | Notes |
|-------------|--------|-------------|-------------|------------|---------|----------------------|-----------|-------|
|             | 60     | Societal    | ZVL         | Control    | 88.4 K  | NA                   | €175      |       |
|             | 70     | Societal    | ZVL         | Control    | 114.9 K | NA                   | €175      |       |
|             | 80     | Societal    | ZVL         | Control    | 196.0 K | NA                   | €175      |       |

49

50 CAD: Canadian Dollars; HIV: human immunodeficiency virus; HSCT: hematopoietic stem cell transplantation; ICER: incremental cost-effectiveness  
51 ratio; K: thousand(s); M/F: male/female; NA: not applicable; RZV: recombinant zoster vaccine; USD: United States Dollars; VE: vaccine  
52 effectiveness; WTP: willingness to pay; YOA: years of age; ZVL: zoster vaccine live

53

54

55 ***REFERENCES***

- 56 1. Le P, Rothberg MB. Cost-effectiveness of the Adjuvanted Herpes Zoster Subunit Vaccine in Older Adults. *JAMA Internal Medicine* 2018; 178(2):248-58.
- 57 2. You JHS, Ming W-K, Lee C-F, Tsang OT-Y, Chan PK-S. Potential cost-effectiveness of adjuvanted herpes zoster subunit vaccine for older adults in Hong  
58 Kong. *Vaccine* 2018; 36(31):4610-20.
- 59 3. Curran D, Patterson B, Varghese L, Van Oorschot D, Buck P, Carrico J, Hicks K, Lee B, Yawn B. Cost-effectiveness of an Adjuvanted Recombinant Zoster  
60 Vaccine in older adults in the United States. *Vaccine* 2018; 36(33):5037-45.
- 61 4. Le P, Rothberg MB. Cost-effectiveness of the Recommendations of the Advisory Committee on Immunization Practices for the Recombinant Adjuvanted  
62 Zoster Subunit Vaccine. *JAMA Internal Medicine* 2018; 178(9):1277-8.
- 63 5. de Boer PT, van Lier A, de Melker H, van Wijck AJM, Wilschut JC, van Hoek AJ, Postma MJ. Cost-effectiveness of vaccination of immunocompetent older  
64 adults against herpes zoster in the Netherlands: a comparison between the adjuvanted subunit and live-attenuated vaccines. *BMC Medicine* 2018; 16(1):228.
- 65 6. Van Oorschot D, Anastassopoulou A, Poulsen Nautrup B, Varghese L, von Krempelhuber A, Neine M, Lorenc S, Curran D. Cost-effectiveness of the  
66 recombinant zoster vaccine in the German population aged  $\geq 60$  years old. *Human Vaccines & Immunotherapeutics* 2019; 15(1):34-44.
- 67 7. Curran D, Patterson BJ, Van Oorschot D, Buck PO, Carrico J, Hicks KA, Lee B, Yawn BP. Cost-effectiveness of an adjuvanted recombinant zoster vaccine in  
68 older adults in the United States who have been previously vaccinated with zoster vaccine live. *Human Vaccines & Immunotherapeutics* 2019; 15(4):765-71.
- 69 8. You JHS, Ming W-K, Tsang OT-Y, Chan PK-S. Optimal gender-specific age for cost-effective vaccination with adjuvanted herpes zoster subunit vaccine in  
70 Chinese adults. *PLOS One* 2019; 14(1):e0210005.
- 71 9. Prosser LA, Harpaz R, Rose AM, Gebremariam A, Guo A, Ortega-Sanchez IR, Zhou F, Dooling K. A Cost-Effectiveness Analysis of Vaccination for Prevention  
72 of Herpes Zoster and Related Complications: Input for National Recommendations. *Annals of Internal Medicine* 2019; 170(6):380-8.
- 73 10. Shiragami M, Mizukami A, Kaise T, Curran D, Van Oorschot D, Bracke B, Watanabe D. Cost-Effectiveness of the Adjuvant Recombinant Zoster Vaccine in  
74 Japanese Adults Aged 65 Years and Older. *Dermatology and Therapy* 2019; 9(2):281-97.
- 75 11. Hoshi S-L, Seposo X, Shono A, Okubo I, Kondo M. Cost-effectiveness of Recombinant Zoster Vaccine (RZV) and Varicella Vaccine Live (VVL) against herpes  
76 zoster and post-herpetic neuralgia among adults aged 65 and over in Japan. *Vaccine* 2019; 37(27):3588-97.

- 77 12. Carpenter CF, Aljasseem A, Stassinopoulos J, Pisacreta G, Hutton D. A Cost-effectiveness Analysis of an Adjuvanted Subunit Vaccine for the Prevention of  
78 Herpes Zoster and Post-herpetic Neuralgia. *Open Forum Infectious Diseases* 2019; 6(7):ofz219.
- 79 13. Drolet M, Zhou Z, Sauvageau C, DeWals P, Gilca V, Amini R, Bénard É, Brisson M. Effectiveness and cost-effectiveness of vaccination against herpes zoster  
80 in Canada: a modelling study. *Canadian Medical Association Journal* 2019; 191(34):E932-E9.
- 81 14. McGirr A, Van Oorschot D, Widenmaier R, Stokes M, Ganz ML, Jung H, Varghese L, Curran D. Public Health Impact and Cost-Effectiveness of Non-live  
82 Adjuvanted Recombinant Zoster Vaccine in Canadian Adults. *Appl Health Econ Health Policy* 2019; 17(5):723-32.
- 83 15. Curran D, Van Oorschot D, Matthews S, Hain J, Salem AE, Schwarz M. Long-term efficacy data for the recombinant zoster vaccine: impact on public health  
84 and cost effectiveness in Germany. *Human Vaccines & Immunotherapeutics* 2021; 17(12):5296-303.
- 85 16. Pieters Z, Ogunjimi B, Beutels P, Bilcke J. Cost-Effectiveness Analysis of Herpes Zoster Vaccination in 50- to 85-Year-Old Immunocompetent Belgian  
86 Cohorts: A Comparison between No Vaccination, the Adjuvanted Subunit Vaccine, and Live-Attenuated Vaccine. *Pharmacoeconomics* 2022; 40(4):461-76.
- 87 17. Ortega-Sanchez IR. Economics of vaccinating immunocompromised 19–49-years-old adults against herpes zoster in the US. 2021. [5/10/2022].  
88 <https://www.cdc.gov/vaccines/acip/meetings/downloads/slides-2021-09-29/02-ZosterVaccines-OrtegaSanchez-508.pdf>.
- 89 18. Ultsch B, Weidemann F, Koch J, Siedler A. Modellierung von epidemiologischen und gesundheitsökonomischen: Effekten von Impfungen zur Prävention  
90 von Herpes zoster. 2017. [5/10/2022].  
91 [https://www.rki.de/DE/Content/Infekt/Impfen/ImpfungenAZ/Zoster/Modellierung\\_Zoster\\_Impfung.pdf?\\_\\_blob=publicationFile](https://www.rki.de/DE/Content/Infekt/Impfen/ImpfungenAZ/Zoster/Modellierung_Zoster_Impfung.pdf?__blob=publicationFile).
- 92 19. Baxter R, Bartlett J, Fireman B, Marks M, Hansen J, Lewis E, Aukes L, Chen Y, Klein NP, Saddier P. Long-Term Effectiveness of the Live Zoster Vaccine in  
93 Preventing Shingles: A Cohort Study. *American Journal of Epidemiology* 2018; 187(1):161-9.
